# Supplementary material for: Sociodemographic variations in the amount, duration and cost of potentially preventable hospitalisation for chronic conditions among Aboriginal and non-Aboriginal Australians: a period prevalence study of linked public hospital data
Source: PubMed Central journal article supplement — BMJ Open. 2017 Oct 15;7(10):e017331. doi: 10.1136/bmjopen-2017-017331 (PMC5652548; doi:10.1136/bmjopen-2017-017331), 2017-10-15
Supplement: bmjopen-2017-017331.draft_revisions.pdf [file bmjopen-2017-017331.draft_revisions.pdf]

# BMJ Open

BMJ Open is committed to open peer review. As part of this commitment we make the peer review history of every article we publish publicly available.

When an article is published we post the peer reviewers' comments and the authors' responses online. We also post the versions of the paper that were used during peer review. These are the versions that the peer review comments apply to.

The versions of the paper that follow are the versions that were submitted during the peer review process. They are not the versions of record or the final published versions. They should not be cited or distributed as the published version of this manuscript.

BMJ Open is an open access journal and the full, final, typeset and author-corrected version of record of the manuscript is available on our site with no access controls, subscription charges or pay-per-view fees (<http://bmjopen.bmj.com>).

If you have any questions on BMJ Open's open peer review process please email [editorial.bmjopen@bmj.com](mailto:editorial.bmjopen@bmj.com)

# BMJ Open

## Socio-demographic variations in the amount, duration and cost of potentially preventable hospitalisation for chronic conditions amongst Aboriginal and non-Aboriginal Australians: a cross-sectional analysis of linked public hospital data

|                                 |                                                                                                                                                                                                                                                                                                                                                                                                                                                                                                                                                                                                                                                                                                                                          |
|---------------------------------|------------------------------------------------------------------------------------------------------------------------------------------------------------------------------------------------------------------------------------------------------------------------------------------------------------------------------------------------------------------------------------------------------------------------------------------------------------------------------------------------------------------------------------------------------------------------------------------------------------------------------------------------------------------------------------------------------------------------------------------|
| Journal:                        | <i>BMJ Open</i>                                                                                                                                                                                                                                                                                                                                                                                                                                                                                                                                                                                                                                                                                                                          |
| Manuscript ID                   | bmjopen-2017-017331                                                                                                                                                                                                                                                                                                                                                                                                                                                                                                                                                                                                                                                                                                                      |
| Article Type:                   | Research                                                                                                                                                                                                                                                                                                                                                                                                                                                                                                                                                                                                                                                                                                                                 |
| Date Submitted by the Author:   | 19-Apr-2017                                                                                                                                                                                                                                                                                                                                                                                                                                                                                                                                                                                                                                                                                                                              |
| Complete List of Authors:       | Banham, David; The University of Adelaide, School of Public Health, Faculty of Health and Medical Sciences; South Australian Health and Medical Research Institute, Wardliparingga Aboriginal Health<br>Chen, Tenglong; The South Australian Health and Medical Research Institute, Wardliparingga Aboriginal Research Unit; Griffith University, School of Medical Science, Griffith Health<br>Karnon, Jon; The University of Adelaide, School of Public Health, Faculty of Health and Medical Sciences<br>Brown, Alex; The South Australian Health and Medical Research Institute, Wardliparingga Aboriginal Research Unit<br>Lynch, John; The University of Adelaide, School of Public Health, Faculty of Health and Medical Sciences |
| <b>Primary Subject Heading</b>: | Health services research                                                                                                                                                                                                                                                                                                                                                                                                                                                                                                                                                                                                                                                                                                                 |
| Secondary Subject Heading:      | Epidemiology, Health economics                                                                                                                                                                                                                                                                                                                                                                                                                                                                                                                                                                                                                                                                                                           |
| Keywords:                       | length of stay, hospital costs, potentially preventable hospitalisation, PRIMARY CARE, Indigenous population                                                                                                                                                                                                                                                                                                                                                                                                                                                                                                                                                                                                                             |
|                                 |                                                                                                                                                                                                                                                                                                                                                                                                                                                                                                                                                                                                                                                                                                                                          |

SCHOLARONE™  
Manuscripts

1  
2  
3 **Title: Socio-demographic variations in the amount, duration and cost of**  
4  
5 **potentially preventable hospitalisation for chronic conditions amongst**  
6  
7 **Aboriginal and non-Aboriginal Australians: a cross-sectional analysis of**  
8  
9 **linked public hospital data**  
10  
11

12  
13  
14 David Banham<sup>a b \*</sup>

15  
16 Tenglong (Tien) Chen<sup>b c</sup>,

17  
18  
19 Jonathan Karnon<sup>a</sup>,

20  
21  
22 Alex Brown<sup>b</sup>

23  
24  
25 John Lynch<sup>a</sup>

26  
27  
28 <sup>a</sup> School of Public Health, Faculty of Health and Medical Sciences, The University of  
29  
30 Adelaide, Adelaide, SA, Australia

31  
32  
33 <sup>b</sup> Wardliparingga Aboriginal Research Unit, The South Australian Health and Medical  
34  
35 Research Institute, North Terrace, Adelaide, SA, 5000

36  
37  
38 <sup>c</sup> School of Medical Science, Griffith Health, Griffith University, Gold Coast, Qld, Australia

39  
40  
41 <sup>\*</sup> Corresponding author at: School of Public Health, Faculty of Health and Medical Sciences,  
42  
43 The University of Adelaide, North Terrace, Adelaide, SA, 5000, Australia.

44  
45  
46 Email: david.banham@adelaide.edu.au.

47  
48  
49 Phone: +61 8 8128 4252

50  
51 **Word count:** 4203 words

52  
53  
54 **Keywords:** potentially preventable hospitalisation; length of stay; hospital costs; primary  
55  
56 care; Indigenous population.

## Abstract

### Objectives:

To determine disparities in potentially preventable hospitalisations (PPH) for chronic conditions such as angina and diabetes among South Australia's Aboriginal and non-Aboriginal populations across area level socio-economic disadvantage and remoteness.

### Setting:

All South Australian public hospitals.

### Participants:

South Australian residents hospitalised from 2005-06 to 2010-11 and experiencing chronic PPH as defined by the Australian Institute of Health and Welfare.

### Primary outcome measures:

Number and crude, unadjusted rates of chronic PPH and associated total length of stay (LOS) and direct hospital costs. Sex and age adjusted population rate ratios for Aboriginal and non-Aboriginal people were subsequently regressed against area level measures of socio-economic disadvantage and geographic remoteness.

### Results:

Aboriginal South Australians experienced 1.8 (95%CI 1.6-2.1) higher risk of an index chronic PPH compared to non-Aboriginal (11.5 and 6.2 per 1,000 persons per year respectively) and at younger ages (median age 48 versus 70). Once hospitalised, Aboriginal people experienced more chronic PPH events, longer total LOS with higher costs (2.6 PPH, 11.7 days LOS at AUD\$17,928 versus 1.9 PPH, 9.0 days at AUD\$11,515). Total Aboriginal LOS rate increased by 0.03 (95% CI 0.00-0.07) for each increase in disadvantage rank and 1.04 (95%CI 0.63-1.44) as remoteness increased. Non-Aboriginal rates increased by 0.01 (95%CI 0.01-0.01) per increase in disadvantage. Similarly, costs associated with Aboriginal chronic PPH rate increased by 0.00.02 (95% CI 0.00-0.06) for each increase in disadvantage rank and 1.18 (95%CI 0.80-1.55) as remoteness increased. Non-Aboriginal rates increased by 0.01 (95%CI 0.01-0.01) per increase in disadvantage.

### Conclusion:

1  
2  
3 Aboriginal people's heightened risk of chronic PPH at much younger ages meant more time  
4 in hospital at greater cost. Systematic increases in chronic PPH by Aboriginality, area  
5 disadvantage and remoteness suggest addressing disparities through commensurately  
6 improved uptake of effective primary care in those areas. Routine, regional reporting will  
7 help monitor progress in meeting population needs.  
8  
9  
10

11  
12  
13  
14  
15  
16  
17 **Article summary:**  
18

- 19  
20  
21 • Previous studies have not examined variations of total length of stay and direct hospital  
22 costs associated with chronic PPH.  
23  
24  
25  
26 • The dataset comprises a complete collection of public hospital records over a six year  
27 period from 2005-06 to 2010-2011.  
28  
29  
30  
31 • The study provides a necessary baseline for a performance measure of importance to the  
32 health system and patients receiving care.  
33  
34  
35  
36  
37 • Hospital records of residents living in very remote areas who were hospitalised in other  
38 jurisdictions were not included in this study.  
39  
40  
41  
42  
43  
44  
45  
46  
47  
48  
49  
50  
51  
52  
53  
54  
55  
56  
57  
58  
59  
60

## Background

Chronic health conditions are increasingly important contributors to poor population health throughout the world<sup>1</sup>. The increased prevalence and duration of these conditions adds to the mounting pressure on health systems to respond to those needs. Hospital expenditures are a key component of these systems<sup>2</sup>. Australia is an example of a developed and advantaged setting where annual hospital expenditure represents the largest recurrent and growing contribution<sup>3 4</sup> to the average health expenditure of \$6,639 per person<sup>5</sup>.

In constrained budgetary environments, hospitals are constantly scrutinised for potential efficiency gains and several performance measures have been adopted. For example, inpatient length of stay (LOS) is closely associated with hospital cost<sup>6</sup> and reimbursement levels within the health system<sup>7</sup> and Australia employs LOS within a suite of health system performance measures<sup>3 8</sup>. LOS is routinely analysed at hospital level with one hospital's performance contrasted against others. Such comparisons often make statistical adjustment for factors outside of a hospital's control, for instance, patient age, medical complexity and residential and geographic location. Each of these factors also influence the costs of hospital stays<sup>9</sup> and are factored into activity based funding models<sup>7</sup>. From a hospital's perspective, LOS indicates efficient production of care at a level adequate to meet clinical need while maximising bed availability and minimising treatment costs. From a patient perspective, hospital LOS means maximising quality outcomes from care while minimising risk of exposure to adverse events in hospital and time away from usual, societal roles.

Potentially Preventable Hospitalisations (PPH) are another performance indicator making use of administrative data<sup>10-12</sup>. Under different names, potentially avoidable hospitalisations or ambulatory care sensitive conditions, and with some variations in conditions and coding<sup>13-15</sup>,

1  
2  
3 PPH are widely considered an indicator of a community's capacity to benefit from available  
4 and effective<sup>16-19</sup> primary health care by "preventing the onset of an illness or condition,  
5  
6  
7 controlling an acute episodic illness or condition, or managing a chronic disease or condition"  
8  
9  
10 p163<sup>20</sup>. Primary health care is the second most expensive component of Australia's health  
11  
12 system at almost \$55 billion annually<sup>4</sup>. Recent expert commentary argued Australia's primary  
13  
14 health system provides around half the level of care recommended for chronic conditions  
15  
16 which contributes to chronic PPH \$2 billion annual cost to the health system<sup>21</sup>. Therefore,  
17  
18 PPH provide an important junction between two critical system components in which  
19  
20 policymakers and health planners can consider both the technical efficiency of one sector, its  
21  
22 effect on another sector and opportunities to adjust allocations across sectors. Efficient use of  
23  
24 healthcare resources can maximise health outcomes in the community served<sup>22</sup>.

25  
26  
27  
28  
29 Equitable distribution of health is another high priority<sup>22</sup> and a challenging issue for  
30  
31 contemporary health systems<sup>22-25</sup>. PPH result from a complex interplay of person-related<sup>26 27</sup>,  
32  
33 health system, geographical<sup>28</sup> and socio-economic factors<sup>29-31</sup> which highlight the need for  
34  
35 directing resources toward appropriate and accessible health services<sup>25</sup>. It follows then that  
36  
37 localised understanding can help determine local responses to health need<sup>22</sup>. Consequently,  
38  
39 the Organisation for Economic Co-operation and Development encourages health systems to  
40  
41 consider health care variations *within* as well as between countries<sup>32</sup>. Australia's Institute of  
42  
43 Health and Welfare (AIHW) works towards this by reporting PPH time series by age group,  
44  
45 sex, state/territory jurisdictions, socioeconomic disadvantage, remoteness and Aboriginal and  
46  
47 Torres Strait Islander status (herein respectively referred to as "Aboriginal")<sup>33</sup>. Overall PPH  
48  
49 rates are three times higher for Aboriginal compared to non-Aboriginal Australians<sup>33 34</sup>  
50  
51 which supports their designation as a disadvantaged group in terms of their use of primary  
52  
53 health care<sup>35</sup>. This is consistent with indigenous population comparisons in the US<sup>36</sup>,  
54  
55  
56  
57  
58  
59  
60

1  
2  
3 Canada<sup>37</sup> and New Zealand<sup>38</sup>. Chronic conditions including: angina, asthma, COPD,  
4  
5 congestive cardiac failure, diabetes complications, hypertension, iron deficiency anaemia,  
6  
7 nutritional deficiencies and rheumatic heart disease, account for much of PPH for which there  
8  
9 is a five-fold differences in the hospitalisation rates by Aboriginality<sup>33 34</sup>. Hence, chronic  
10  
11 health conditions represent a significant proportion of PPH with diabetes complications being  
12  
13 most frequent PPH amongst Aboriginal Australians<sup>33 39 40</sup>. Similar disparities between  
14  
15 Aboriginal and non-Aboriginal populations are reported in Victoria<sup>41</sup>, the Northern  
16  
17 Territory<sup>42</sup>, Queensland<sup>43</sup>, Western Australia<sup>44</sup>, New South Wales<sup>45</sup> and South Australia  
18  
19 (SA)<sup>46 47</sup>.

20  
21  
22  
23  
24  
25 Despite considerable evidence of variations in PPH rates and LOS, relatively little is known  
26  
27 about how the two measures co-vary<sup>48</sup>. Given the extent of disparities in chronic PPH rates  
28  
29 by Aboriginality, this appears an opportune place from which to improve understanding of  
30  
31 *who* in the community is more likely to experience potentially unnecessary, prolonged and  
32  
33 costly hospitalisation. The first of only two studies that considered chronic PPH and LOS  
34  
35 together focussed on diabetes hospitalisations among older, Hawaiian people categorised as  
36  
37 either Asian, islander or white<sup>49</sup>. The second, Australian study considered results for  
38  
39 individuals on the basis of Aboriginal identity. The results affirmed higher chronic PPH rates  
40  
41 among Aboriginal people compared to non-Aboriginal contemporaries of the same age, sex  
42  
43 and living in the same geographic area<sup>45</sup>. Moreover, elevated rates were accompanied by  
44  
45 LOS which was 4% higher on average<sup>45</sup>. However, neither study explicitly describes the  
46  
47 variation of chronic PPH and LOS rates within the populations studied, yet evidence in other  
48  
49 areas point to considerable within-population heterogeneity in health outcomes. For example,  
50  
51 analysis of premature mortality among Aboriginal South Australians showed an interaction  
52  
53  
54  
55  
56  
57  
58  
59  
60



1  
2  
3 between area level socioeconomic disadvantage and remoteness where the social gradient  
4  
5 between disadvantage and premature mortality outcomes increased as remoteness increased<sup>50</sup>.  
6  
7

8  
9  
10 None of the recently reviewed literature on PPH and LOS analysed the costs associated with  
11  
12 the hospital events. Such information is critical to inform complex commissioning decisions  
13  
14 of the opportunity cost, at least from a health system perspective, of pursuing technical and  
15  
16 allocative efficiencies while reducing the human and societal costs represented by a person's  
17  
18 time out of role.  
19

20  
21  
22  
23 If health systems are to attend to the needs of people and populations, it is important to focus  
24  
25 on individuals and sub-populations in their localised setting. Quantifying disproportionate  
26  
27 hospitalisation, re-hospitalisation and time spent in hospital while simultaneously describing  
28  
29 the system resources involved can provide valuable information on which elements of the  
30  
31 health system are working, for whom and in what context<sup>2,51</sup>.  
32  
33

34  
35  
36 This study considers the disparity between rates of PPH for chronic conditions for Aboriginal  
37  
38 and non-Aboriginal South Australians. It examines the association between area level  
39  
40 socioeconomic disadvantage, geographic remoteness and the frequency, length, and cost of  
41  
42 hospitalisation for chronic PPH within those populations. This paper addresses three  
43  
44 questions. Which individuals experienced chronic PPH? How does the length of stay and cost  
45  
46 of hospitalisation for these conditions vary between Aboriginal and non-Aboriginal  
47  
48 populations? What is the relationship between the ecological risk factors of area level socio-  
49  
50 economic position and remoteness with PPH for chronic diseases within these populations?  
51  
52  
53  
54  
55  
56

## 57 **Methods**

58  
59  
60

### *Ethics approval*

Research ethics committee approvals are held from SA Health (467/08/2014) and the Aboriginal Health Council of South Australia (04-11-406).

### *Study design*

A cross-sectional, observational study using linked, public hospital inpatient records.

### *Hospital separations*

Chronic PPH within the Integrated South Australian Activity Collection (ISAAC) of public hospital, inpatient records for financial years 2005-06 to 2010-11 were categorised using Australian Institute of Health and Welfare's (AIHW) criteria for ICD-10 diagnoses and procedure codes<sup>52</sup>. ISAAC includes mandatory fields of age, Aboriginal identification and Statistical Local Area (SLA) of usual residence. Residents of the Anangu Pitjantjatjara Yankunytjatjara Lands (APY Lands) most frequently attend Alice Springs Hospital in the neighbouring jurisdiction, the Northern Territory, and their records were removed from hospital and population counts.

Hospital costs across the period were calculated in a uniform manner using Australia's National Efficient Price for health care activity provided by public hospitals in 2015-16<sup>7</sup> and expressed in Australian dollars. The prices associated with hospital activities are based on each separation's Australian Refined Diagnostic Related Group (AR-DRGv7.0) with loadings for outlying LOS, Aboriginality (4%) and area remoteness (ranging from 8% in outer regional to 22% for very remote).

### *Hospitalised individuals*

Each person using a South Australian public hospital service has a medical record number unique within a hospital but varying across hospitals. SA-NT DataLink, an organisation

1  
2  
3 within Australia's data linkage network, provided probabilistically linked project keys  
4  
5 enabling the grouping of one person's separations across hospitals and time. Each  
6  
7 individual's records were assigned the last recorded age and the first occurring SLA.  
8  
9  
10 Aboriginality was categorised on the basis of a person having identified as Aboriginal in *any*  
11  
12 hospital separation during the observation period. Identification of Aboriginal status can be  
13  
14 difficult and introduce misclassification bias<sup>53</sup>. Accordingly, a more stringent definition for  
15  
16 sensitivity analyses was based on a person identifying as Aboriginal on more than 75% of  
17  
18 records.  
19

### 20 21 *Population and Statistical Geography*

22  
23  
24 Population denominators were based on Australia's Census years in 2006 and 2011<sup>54</sup>. The  
25  
26 relevant estimates of resident population by sex, age and Aboriginality include sex and age  
27  
28 profiles by rurality and total population for SLAs, the smallest routinely available geographic  
29  
30 areas for intrastate analysis<sup>55</sup>. The mean annual total population for each SLA was 12,584  
31  
32 (SD=10,029) ranging from 0 to 36,407<sup>56</sup>.  
33  
34  
35

36 The Australian Bureau of Statistics (ABS) index SLAs by socio-economic characteristics<sup>57</sup>  
37  
38 and geographic remoteness. Census 2011 Index of Relative Socio-economic Disadvantage  
39  
40 (IRSD)<sup>52 57 58</sup> ranks SLAs whereby 1 is least disadvantage and 123 the most disadvantaged  
41  
42 area. These are further aggregated to disadvantage quintiles of approximately equal  
43  
44 population size<sup>55</sup>. SLAs with nominal population and no relative IRSD rank would not  
45  
46 contribute to the analysis and were omitted. The Accessibility/Remoteness Index of Australia  
47  
48 (ARIA+) uses road distance to service centres<sup>55</sup> to allocate a continuous measure ranging  
49  
50 from 0 (high accessibility) to 15 (high remoteness). SLAs can be collapsed into categories of  
51  
52 major city (ARIA+ <= 0.2), regional (ARIA+ > 0.2 & <= 5.92) and remote areas (ARIA+ >  
53  
54 5.92).  
55  
56  
57  
58  
59  
60

### *Data analysis*

Cross tabulations summarise the number and crude, unadjusted rates of people experiencing chronic PPH with respect to Aboriginality, sex, age and area level IRSD quintiles and remoteness categories. Among these individual patients, the mean number of chronic PPH separations is described along with mean, totalled LOS and hospital costs of those separations.

The summary experience of individuals' outcomes in terms of LOS and costs were then placed into a broader population context. Indirect sex and age adjustment<sup>59</sup> with five year age groupings to 75+<sup>60</sup> controlled for confounding from sex and age variations between Aboriginal and non-Aboriginal people experiencing chronic PPH and the population more generally. Area outcomes therefore represent the ratio of observed versus expected outcome based on South Australian totals. For example, an outcome of 150 for total chronic PPH LOS among a population group indicates the ratio of observed versus expected LOS across that group was one and a half times, or 50% higher, than the South Australian average after adjusting for sex and age differences.

Outcomes of LOS and hospital cost ratios at SLA level were positively skewed and were subsequently normalised using square root transformations. The relationship between transformed outcomes and the potential covariates of SLA IRSD rank and remoteness were examined using least squares regressions<sup>61</sup> with each area's contribution weighted by population size. While the focus was on chronic PPH as a group, diabetes complications are over represented among Aboriginal people so records were further stratified as either diabetes complications or all other chronic PPH with analyses repeated for each. The reported coefficients and 95% confidence intervals represent the change in the standardised ratio for each one unit change in disadvantage rank and remoteness.

1  
2  
3 In sensitivity analyses, use of a more stringent definition of Aboriginality did not change our  
4  
5 overall conclusions<sup>62</sup>. All analyses used Stata version 14.2<sup>63</sup>.  
6  
7  
8  
9

## 10 **Results**

### 11 *Separations*

12  
13  
14  
15  
16 Of 1,828,846 public hospital separations involving usual SA residents, 117,127 (6.4%) were  
17  
18 categorised as chronic PPH. Aboriginal people experienced these at 2.2 (95%CI 2.1-2.4)  
19  
20 times the rate of non-Aboriginals (N=4,391 at 26.7 chronic PPH per 1,000 persons per year  
21  
22 compared to N=112,736 at 12.1 per 1,000 persons per year).  
23  
24

### 25 *Individuals*

26  
27  
28 Chronic PPH involved 60,208 individuals 1,892, or 3.2%, of whom were Aboriginal. Table 1  
29  
30 quantifies aspects of their experience showing Aboriginal people were 1.8 (95%CI 1.6-2.1)  
31  
32 times more likely hospitalised than non-Aboriginal (11.5 and 6.2 per 1,000 persons per year  
33  
34 respectively). There were several marked differences in conditions experienced. For example,  
35  
36 hospitalisations for diabetes complications within the Aboriginal community was 4.3 per  
37  
38 1,000 per year, more than three times the rate among non-Aboriginal people. Diabetes  
39  
40 complications were diagnosed for more than one-third of Aboriginal people with chronic  
41  
42 PPH compared to around one in five among non-Aboriginals. Chronic PPH events can  
43  
44 involve more than one diagnosed chronic condition and this was observed more frequently  
45  
46 among Aboriginal patients. For instance, the 2,311 diagnosed chronic conditions among  
47  
48 1,892 Aboriginal patients hospitalised averages 1.22 per patient. The comparison for non-  
49  
50 Aboriginal patients was 1.14 comprising 66,343 chronic condition diagnoses among 58,316  
51  
52 patients.  
53  
54  
55  
56  
57  
58  
59  
60

1  
2  
3 There were substantial sex and age differences between Aboriginal and non-Aboriginal  
4  
5 people experiencing chronic PPH with females and a much younger age profile dominant in  
6  
7 the Aboriginal patient cohort (median ages of 48 and 70 years respectively). Forty-five  
8  
9 percent of Aboriginal patients were in the 45 to 64 age groups which was equivalent to that of  
10  
11 the largest, non-Aboriginal group aged 75+. Conversely, 75+ was the second smallest  
12  
13 Aboriginal group however the rate with which Aboriginal people experienced chronic PPH  
14  
15 remained nearly double that of non-Aboriginal people (59.7 versus 32.8 persons per 1,000 per  
16  
17 year). The proportion of Aboriginal patients from areas of most disadvantage (54.1% versus  
18  
19 26.7%) or regional and remote areas (64.2% versus 35.6%) was also around double that of  
20  
21 non-Aboriginal people.  
22  
23  
24

25  
26 The number of chronic PPH, associated LOS and estimated hospital cost averaged across  
27  
28 individuals are summarised in Table 2. The dominant pattern is one of more frequent  
29  
30 hospitalisation per Aboriginal person across sex, areas of residence and most age groupings.  
31  
32 The average of 11.7 days LOS was 30% greater for Aboriginal patients with the differences  
33  
34 increasing throughout adulthood to a peak in the 55-74 age ranges. Hospital costs follow a  
35  
36 similar pattern but with more pronounced differences by Aboriginality. For example,  
37  
38 averaged hospital costs accumulated for Aboriginal patients were 56% higher than non-  
39  
40 Aboriginal patients (\$17,928 versus \$11,515) and differences were most prominent in the 55-  
41  
42 74 age ranges with costs averaged across individual patients of \$24,023 for Aboriginal versus  
43  
44 \$12,291 for non-Aboriginal. The absolute difference in excess of \$11,500 represented an  
45  
46 almost two-fold difference in relative terms.  
47  
48  
49

50  
51 Figure 1 illustrates the stark disparity in the rates at which Aboriginal and non-Aboriginal  
52  
53 people of varying ages experienced chronic PPH, then overlays the mean number of  
54  
55 separations those patients experienced. This shows Aboriginal people aged 35-44 and over  
56  
57  
58  
59  
60

1  
2  
3 not only experienced markedly higher rates of chronic PPH but having had a first event, they  
4  
5 were increasingly likely to experience at least one more event.  
6  
7

### 8 *Population*

9  
10 Figure 2 places results for individuals hospitalised into a population context by graphing sex  
11 and age standardised outcomes by Aboriginality (LOS in Figure 2A and costs in Figure 2B)  
12 for all areas, then disadvantage quintiles and remoteness categories. Each marker is weighted  
13 by population as per Supplemental Online Table A. Figure 2A illustrates the LOS rate  
14 associated with chronic PPH within the Aboriginal population was six times more than the  
15 state average after adjusting for sex and age. While chronic PPH LOS among Aboriginal and  
16 non-Aboriginal populations progressively increased across levels of area disadvantage,  
17 change was far more pronounced within the Aboriginal population while also concentrated  
18 among the relatively larger disadvantaged populations in Quintiles 4 and 5. Similarly, from  
19 major city to remote locations involved nearly threefold higher results from 4.2 to 12.1 times  
20 the state average. Hospital costs incurred (Figure 2B) show very similar patterns with slightly  
21 higher mean differences between Aboriginal and non-Aboriginal results.  
22  
23  
24  
25  
26  
27  
28  
29  
30  
31  
32  
33  
34  
35  
36  
37

38 Linear regression models between the two outcomes of standardised LOS and cost ratios  
39 across three levels (all chronic PPH; diabetes complications; all other chronic PPH) and the  
40 covariates of area level disadvantage and remoteness are presented for Aboriginal and non-  
41 Aboriginal populations in Table 3. For Aboriginal people, both LOS and cost outcomes for  
42 each level varied significantly across area disadvantage and remoteness. For example, within  
43 the Aboriginal population the standardised LOS rate ratio associated with all chronic PPH  
44 was 2.09 (95%CI 0.00-5.83) times the state average (of one). The disparity in LOS rate  
45 increased by an average of 0.03 (95% CI 0.00-0.07) with each change in disadvantage rank  
46 and a further 1.04 (95%CI 0.63-1.44) as remoteness increased. These associations of  
47  
48  
49  
50  
51  
52  
53  
54  
55  
56  
57  
58  
59  
60

1  
2  
3 disadvantage and remoteness with LOS were consistent within stratified subgroups of  
4  
5 diabetes complications and all other chronic PPH. However, the magnitude of change in LOS  
6  
7 ratios was higher for diabetes complications (2.59; 95%CI 0.00-10.82) than for all other  
8  
9 chronic PPH (1.86; 95%CI 0.43-1.21) before adjusting for the influence of area disadvantage  
10  
11 and remoteness. The change observed in LOS for diabetes complications was around twice  
12  
13 that for all other chronic PPH for both disadvantage (0.05; 95%CI 0.00-0.15 versus 0.02;  
14  
15 95%CI 0.00-0.06) and remoteness (1.62; 95%CI 0.73-2.51 versus 0.82; 95%CI 0.43-1.21).  
16  
17 Similar variations in standardised cost ratio outcomes across levels of outcome and by  
18  
19 disadvantage and remoteness were observed for the Aboriginal population.  
20  
21

22  
23 Results for the non-Aboriginal population also show consistent associations between area  
24  
25 disadvantage and each outcome and level whereby the standardised ratio increased as  
26  
27 disadvantage increased. However, area remoteness was not associated with increased LOS or  
28  
29 cost. Moreover, the base from which change occurred was substantially lower. For instance,  
30  
31 the standardised LOS ratio for chronic PPH among the non-Aboriginal population before  
32  
33 adjusting for disadvantage rank was 46% (95%CI 38%-54%), or less than half that of the  
34  
35 state average.  
36  
37  
38  
39  
40  
41  
42

## 43 Discussion

44  
45 This study provides evidence of stark disparities in the rates with which Aboriginal and non-  
46  
47 Aboriginal individuals experienced potentially preventable hospitalisation for chronic  
48  
49 conditions. Aboriginal people had almost twice the risk of experiencing a chronic PPH  
50  
51 overall compared to their non-Aboriginal contemporaries. Other disparities noted include  
52  
53 higher chronic PPH rates among Aboriginal females and younger adults with rates steeply  
54  
55 increasing from least to most disadvantaged quintiles and/or remote areas of South Australia.  
56  
57  
58  
59  
60



1  
2  
3 Conversely, non-Aboriginal patients were more likely to be concentrated among older adults.  
4  
5 A social gradient across disadvantage levels was also apparent however the steepness of the  
6  
7 gradient from most to least disadvantaged areas was markedly lower for non-Aboriginal  
8  
9 people. These findings are consistent with the wider literature focused on ethnic differences  
10  
11 in PPH<sup>36-38</sup> and underpin the disproportionate population rates of chronic PPH among  
12  
13 Aboriginal South Australians<sup>10 52 64</sup>.

14  
15  
16  
17 This analysis at the individual level furthers our understanding by demonstrating how, having  
18  
19 experienced one chronic PPH event, Aboriginal patients were also more likely to endure  
20  
21 further chronic PPH. This was associated with an increased accrual of time spent in hospital  
22  
23 which was almost one-third higher for Aboriginal patients. Moreover, the associated hospital  
24  
25 costs were more than 50% higher than for non-Aboriginal patients on average and more  
26  
27 variable within the group of Aboriginal patients.  
28  
29

30  
31 Sex and age adjusted rates of time spent in hospital for chronic PPH and expressed as rates  
32  
33 per capita reflect the number of individuals and the length of time hospitalised. These  
34  
35 standardised population outcomes showed LOS for chronic PPH among Aboriginal South  
36  
37 Australians was six times higher than the state average. The best outcomes within the  
38  
39 Aboriginal community were observed among the relatively few living in areas of least  
40  
41 disadvantage, albeit these were still markedly higher than the state average. Diabetes  
42  
43 complications are heavily implicated in chronic PPH for Aboriginal people. Their presence,  
44  
45 with or without other chronic conditions, exacerbate LOS rates and hospital costs among  
46  
47 Aboriginal people but not so within the non-Aboriginal population. Even after partitioning  
48  
49 out diabetes related hospitalisations, substantial differences in LOS and cost remain among  
50  
51 other chronic PPH experienced by Aboriginal people.  
52  
53  
54  
55  
56  
57  
58  
59  
60

1  
2  
3 The results further highlight systematic inequities between populations while also  
4 highlighting substantial within-population variation whereby a relatively small number of  
5 people experienced considerable time in hospital and away from their usual societal roles  
6 because of chronic health conditions. This is consistent with recent US literature  
7 demonstrating the role of chronic PPH, and particularly diabetes, as sustaining and even  
8 increasing disparities between African Americans and whites<sup>65</sup>. Similarly, it affirms other  
9 Australian research highlighting widespread Aboriginal/non-Aboriginal differences and  
10 differences within the Aboriginal population in chronic PPH generally and the pervasive,  
11 adverse results of diabetes complications across geographic areas<sup>45</sup>. Moreover, the results  
12 identified that increased chronic PPH were accompanied by systematically increased accrual  
13 of LOS and greater hospital costs.  
14  
15  
16  
17  
18  
19  
20  
21  
22  
23  
24  
25  
26  
27

28 The extent to which these differences are amenable to change needs further discussion. By  
29 definition, chronic PPH represent opportunities for change through exposure to primary  
30 health care, notwithstanding a range of individual, societal, clinical and system level factors  
31 are related to their occurrence<sup>66 67</sup> and may each be associated with realising this potential.  
32 This is supported by studies of risk factor exposure across levels of socio-economic  
33 disadvantage and remoteness<sup>34</sup>. If hospital LOS is a proxy measure for clinical severity as  
34 suggested by some<sup>68</sup>, then the results provide a precursor to mortality figures displaying very  
35 similar associations between premature mortality outcomes in SLAs, disadvantage and  
36 remoteness among Aboriginal South Australians and disadvantage among non-Aboriginal  
37 South Australians<sup>69</sup>. Whether the chronic PPH events were preventable in their immediate  
38 context is less certain. The high prevalence of diabetes complications and higher levels of  
39 chronic multi-morbidities among Aboriginal patients observed in this study suggests  
40 comparatively more advanced disease for which hospitalisations, more often, for longer  
41  
42  
43  
44  
45  
46  
47  
48  
49  
50  
51  
52  
53  
54  
55  
56  
57  
58  
59  
60

1  
2  
3 periods and at greater cost is an appropriate and expected result. A heightened need for  
4 preventive and early intervention through primary and community care is evident.  
5  
6

7  
8 In response, promising primary healthcare interventions in chronic disease management and  
9 diabetes are available. Australia's largest randomised intervention in diabetes delivered  
10 positive outcomes in HbA1c levels, blood pressure, waist circumference, depression, care-  
11 plan take-up and chronic PPH in the trial group receiving each of five available quality  
12 improvement and flexible funding components<sup>40</sup>. Mainstream general practice services are  
13 less available for remote Aboriginal populations exhibiting greater need in terms of chronic  
14 PPH LOS and costs yet evidence of effective intervention among Aboriginal populations is  
15 available<sup>70</sup>. Randomised diabetes care led by community health workers in regional and  
16 remote areas showed promising HbA1c reductions among poorly controlled type 2 diabetes  
17 patients<sup>71</sup> and modest net reductions in diabetes related hospitalisation in the treatment  
18 group<sup>72</sup>. Nevertheless, a critical need for substantively increasing the training and supply of  
19 Aboriginal health care workers remains<sup>73</sup>. Generally negative evaluation of incremental cost-  
20 effectiveness assessments based on short-term, averaged and disease specific results<sup>40 72</sup> may  
21 impede this investment.  
22  
23  
24  
25  
26  
27  
28  
29  
30  
31  
32  
33  
34  
35  
36  
37  
38

39 Our description of who is more likely to experience chronic PPH, for what conditions, with  
40 what frequency and at what direct cost to the health system suggest three areas for developing  
41 incremental cost to outcome analyses. The first is to consider flow-on benefits from disease-  
42 specific interventions to other comorbid chronic conditions, especially where disparities in  
43 condition prevalence exist. Second, evaluation based on longer term accumulated  
44 hospitalisation costs for individual trial participants is warranted. Where project term  
45 constraints apply, our results provide an initial empiric base. Finally, placing individual  
46 participant results into a population context provides an information base for allocating  
47  
48  
49  
50  
51  
52  
53  
54  
55  
56  
57  
58  
59  
60

1  
2  
3 resources which address health care needs for primary and community care at lower cost to  
4  
5 individuals and acute care services<sup>25</sup>.  
6  
7

8 Subsequent reporting of cumulative LOS and costs at a person level adds value to system  
9  
10 performance monitoring by making the person and patient the centre of reporting and  
11  
12 evaluation, as well as the centre of care. Providing empirical evidence of change occurring at  
13  
14 individual and population levels will help align system activities and monitoring with the  
15  
16 ultimate aim of providing appropriate and effective care of patients and people, equitably and  
17  
18 efficiently.  
19  
20

### 21 *Limitations*

22  
23  
24 The study has several limitations. First, cumulative LOS as an outcome variable is influenced  
25  
26 by the nature of admission with inter-hospital transfers having longer LOS than emergency  
27  
28 admissions<sup>6</sup>. Recurrent hospital events for chronic conditions among people in regional and  
29  
30 remote settings may involve comparatively more inter-hospital transfers or planned  
31  
32 admissions for treatment where primary health interventions are scarce. Nevertheless, the  
33  
34 observations summarised in this study represent an aspect of peoples' lived experience of  
35  
36 contending with chronic disease. Continuing research will benefit from focussing on mode of  
37  
38 admission to hospital and the local availability of primary care. Second, the propensity to  
39  
40 identify as Aboriginal has increased across recent times and any undercounting in earlier  
41  
42 Aboriginal population denominators would affect population rates. However, this study's  
43  
44 population estimates are drawn from the internally consistent ABS series covering 1996 to  
45  
46 2011 as based on the 2011 Census and the first available set of ABS non-experimental  
47  
48 population denominators. Thus, there is no known inflation of rates due to population  
49  
50 undercounts. Nevertheless, estimates incorporating Census 2016 will provide a valuable  
51  
52 reliability check when used with concurrent hospital data in future analyses. Third, the  
53  
54  
55  
56  
57  
58  
59  
60

1  
2  
3 omission of the APY Lands SLA means chronic PPH outcomes associated with a very remote  
4 area and SA's most disadvantaged are not represented<sup>74</sup>. Subsequent research in the area will  
5 benefit from including APY Land residents hospitalised in the Northern Territory<sup>47</sup> to ensure  
6 results for the most remote and disadvantaged population groups are not underestimated.  
7  
8  
9  
10  
11  
12  
13

## 14 15 **Conclusion**

16  
17 The results show heightened risk of chronic PPH among Aboriginal people which compounds  
18 into more re-hospitalisation and accumulated time in hospital at greater cost to the individual,  
19 their community and the health system. At a population level, the systematic change in  
20 chronic PPH and LOS by Aboriginality and area suggests efforts to address these potentially  
21 avoidable hospitalisations will benefit from targeting specific population segments,  
22 particularly in areas of greater socio-economic disadvantage and geographic remoteness. This  
23 analysis helps guide such actions by identifying sub-populations within the wider community  
24 who could most benefit from improved understanding of antecedent causes of hospitalisation.  
25 Routine, reporting across population groups and regions will help monitor progress in  
26 meeting the underlying population health needs with earlier, and perhaps lower cost,  
27 interventions.  
28  
29  
30  
31  
32  
33  
34  
35  
36  
37  
38  
39  
40  
41  
42  
43  
44  
45  
46  
47  
48  
49  
50  
51  
52  
53  
54  
55  
56  
57  
58  
59  
60

## 46 **Abbreviations**

49 ABS: Australian Bureau of Statistics

51 AIHW: Australian Institute of Health and Welfare;

53 APY Lands: Anangu Pitjantjatjara Yankunytjatjara Lands;

55 ISAAC: Integrated South Australian Activity Collection;

57 LOS: Length of stay;

1  
2  
3 PPH: Potentially preventable hospitalisation;  
4

5 SA: South Australia;  
6

7 SLA: Statistical Local Areas;  
8  
9

### 10 11 12 13 **Author contributions**

14  
15 DB conceived the project, performed the analyses and drafted the manuscript; TC contributed  
16  
17 to literature searching and manuscript preparation; JK, AB and JL made important  
18  
19 contributions to operationalising this study, interpreting the statistical analysis, and revised  
20  
21 the manuscript. All authors read and approved the final version of the manuscript.  
22  
23

### 24 25 **Acknowledgements**

26  
27 DB is supported in part by an Australian Government Research Training Program  
28  
29 Scholarship. AB is supported by The Sylvia and Charles Viertel Senior Medical Research  
30  
31 Fellowship. The authors thank: SAHMRI & the Wardliparingga Aboriginal Health Research  
32  
33 Unit for providing a Summer Scholarship for TC; and, SA Health for administrative unit  
34  
35 records via Statistical Linkage Project 2010-0004. John Glover, Torrens University's Public  
36  
37 Health Information Development Unit (PHIDU) and the Australian Department of Health for  
38  
39 Aboriginal and Torres Strait Islander small area population estimates for 2006.  
40  
41  
42  
43  
44

45 The authors declare they have no competing interests.  
46  
47  
48  
49

### 50 51 **Funding Statement**

52  
53 There is no funding to report for this submission.  
54  
55  
56  
57  
58  
59  
60

## Data Sharing Statement

The study's data comprised of de-identified unit record administrative records. These were used under privileged arrangements set out in a study specific confidentiality deed. The data cannot be accessed by another party without relevant departmental and human research ethics approvals.

## References

1. Vos T, Flaxman AD, Naghavi M, et al. Years lived with disability (YLDs) for 1160 sequelae of 289 diseases and injuries 1990–2010: a systematic analysis for the Global Burden of Disease Study 2010. *The Lancet* 2012;380(9859):2163-96. doi: [http://dx.doi.org/10.1016/S0140-6736\(12\)61729-2](http://dx.doi.org/10.1016/S0140-6736(12)61729-2)
2. Alliance for Health Policy and System Research. Systems Thinking for Health Systems Strengthening. Geneva: World Health Organization, 2009.
3. Victorian Auditor-General's Report. Hospital Performance: Length of Stay. Melbourne: Victorian Government, 2016.
4. Australian Institute of Health and Welfare. Health expenditure Australia 2013–14: analysis by sector. Canberra: AIHW, 2015.
5. Australian Institute of Health and Welfare. Health expenditure Australia 2013–14. Canberra: AIHW, 2015.
6. Kulinskaya E, Kornbrot D, Gao H. Length of stay as a performance indicator: robust statistical methodology. *IMA Journal of Management Mathematics* 2005;16(4):369-81.
7. Independent Hospital Pricing Authority. National Efficient Price Determination: 2015-16: IHPA, 2015.
8. National Health Performance Authority. Hospital Performance: Length of stay in public hospitals in 2011–12. Sydney: NHPA, 2013.
9. Penno E, Gauld R, Audas R. How are population-based funding formulae for healthcare composed? A comparative analysis of seven models. *BMC health services research* 2013;13(1):470.
10. Australian Institute of Health and Welfare. Australian hospital statistics 2012–13. Canberra: AIHW, 2014.
11. Australian Institute of Health and Welfare. National Healthcare Agreement: PI 18-Selected potentially preventable hospitalisations, 2013. 2013
12. National Health Performance Authority. National Health Reform: Performance and Accountability Framework: National Health Performance Authority, 2013.
13. Katterl R, Anikeeva O, Butler C, et al. Potentially avoidable hospitalisations in Australia: Causes for hospitalisations and primary health care interventions. 2012
14. Jackson G, Tobias M. Potentially avoidable hospitalisations in New Zealand, 1989-98. *Australian and New Zealand Journal of Public Health* 2001;25(3):212.
15. Longman J, Passey M, Ewald D, et al. Admissions for chronic ambulatory care sensitive conditions - a useful measure of potentially preventable admission? *BMC Health Services Research* 2015;15(1):472.

16. Agency for Healthcare Research and Quality. Quality Indicator User Guide: Prevention Quality Indicators (PQI) Composite Measures Version 4.4. Rockville: US Department of Health and Human Services, 2012.
17. Rosano A, Loha CA, Falvo R, et al. The relationship between avoidable hospitalization and accessibility to primary care: a systematic review. *The European Journal of Public Health* 2013;23(3):356-60. doi: 10.1093/eurpub/cks053
18. Niti M, Ng TP. Avoidable hospitalisation rates in Singapore, 1991-1998: Assessing trends and inequities of quality in primary care. *Journal of Epidemiology and Community Health* 2003;57(1):17-22.
19. Ansari Z, Haider SI, Ansari H, et al. Patient characteristics associated with hospitalisations for ambulatory care sensitive conditions in Victoria, Australia. *BMC Health Services Research* 2012;12(1)
20. Billings J, Zeitel L, Lukomnik J, et al. Impact of socioeconomic status on hospital use in New York City. *Health Affairs* 1993;12(1):162-73.
21. Swerissen H, Duckett S, Wright J. Chronic failure in primary medical care: Grattan Institute, 2016.
22. Culyer AJ. Efficiency, equity and equality in health and health care: Centre for Health Economics, University of York, 2016.
23. Muenchberger H, Kendall E. Determinants of avoidable hospitalization in chronic disease: Development of a predictor matrix. *Meadowbrook: Griffith University* 2008
24. McIntyre D, Mooney G, editors. *The Economics of Health Equity* Cambridge: Cambridge University Press, 2007.
25. Diderichsen F. Resource allocation for Health Equity: Issues and methods. Washington DC: The World Bank, 2004.
26. Laditka J, Laditka S. Race, ethnicity and hospitalization for six chronic ambulatory care sensitive conditions in the USA. *Ethnicity and Health* 2006;11(3):247-63.
27. Moy E, Mau MK, Raetzman S, et al. Ethnic differences in potentially preventable hospitalizations among Asian Americans, Native Hawaiians, and Other Pacific Islanders: Implications for reducing health care disparities. *Ethnicity and Disease* 2013;23(1):6-11.
28. Booth GL, Hux JE, Fang J, et al. Time trends and geographic disparities in acute complications of diabetes in Ontario, Canada. *Diabetes Care* 2005;28(5):1045-50.
29. Muenchberger H, Kendall E. Predictors of preventable hospitalization in chronic disease: Priorities for change. *Journal of Public Health Policy* 2010;31(2):150-63.
30. Trachtenberg AJ, Dik N, Chateau D, et al. Inequities in ambulatory care and the relationship between socioeconomic status and respiratory hospitalizations: A population-based study of a Canadian city. *Annals of Family Medicine* 2014;12(5):402-07.
31. Roos LL, Walld R, Uhanova J, et al. Physician visits, hospitalizations, and socioeconomic status: ambulatory care sensitive conditions in a Canadian setting. *Health Services Research* 2005;40(4):1167-85.
32. OECD. Geographic Variations in Health Care: OECD Publishing 2014.
33. Australian Institute of Health and Welfare. Aboriginal and Torres Strait Islander Health Performance Framework 2012: detailed analyses. Canberra: AIHW, 2013.
34. Australian Health Ministers' Advisory Council (AHMAC). Aboriginal and Torres Strait Islander Health Performance Framework 2014 Report. Canberra: Australian Government, Department of the Prime Minister and Cabinet, 2015.
35. Bywood PT, Katterl R, Lunnay BK. Disparities in primary health care utilisation: Who are the disadvantaged groups? How are they disadvantaged? What interventions work? 2011
36. Korenbrot CC, Ehlers S, Crouch JA. Disparities in hospitalizations of rural American Indians. *Medical Care* 2003;41(5):626-36.
37. Shah BR, Gunraj N, Hux JE. Markers of Access to and Quality of Primary Care for Aboriginal People in Ontario, Canada. *American Journal of Public Health* 2003;93(5):798-802.



- 1
- 2
- 3 38. Barnett R, Malcolm L. Practice and ethnic variations in avoidable hospital admission rates in
- 4 Christchurch, New Zealand. *Health & place* 2010;16(2):199-208.
- 5 39. Gibson OR, Segal L, McDermott RA. A systematic review of evidence on the association between
- 6 hospitalisation for chronic disease related ambulatory care sensitive conditions and primary
- 7 health care resourcing. *BMC health services research* 2013;13(1):1-13.
- 8 40. Department of Health. Evaluation Report of the Diabetes Care Project. Canberra: Australian
- 9 Government, 2016.
- 10 41. Ansari MZ, Simmons D, Hart WG, et al. Preventable hospitalisations for diabetic complications in
- 11 rural and urban Victoria. *Australian Journal of Primary Health - Interchange* 2000;6(3-4):261-
- 12 73.
- 13 42. Li SQ, Gray N, Guthridge S, et al. Avoidable hospitalisation in Aboriginal and non-Aboriginal
- 14 people in the Northern Territory. 2009
- 15 43. Anderson M, Dugdale A. Ambulatory services in an aboriginal community and a west Queensland
- 16 rural area. *The Australian journal of rural health* 1997;5(3):121-25.
- 17 44. Department of Health. Annual Performance Management Framework 2014-2015: Activity Based
- 18 Funding and Management Program. Perth: Department of Health, 2014.
- 19 45. Harrold TC, Randall DA, Falster MO, et al. The contribution of geography to disparities in
- 20 preventable hospitalisations between indigenous and non-indigenous Australians. *PLoS ONE*
- 21 2014;9(5)
- 22 46. Banham D, Woollacott T, Gray J, et al. Recognising potential for preventing hospitalisation.
- 23 *Australian Health Review* 2010;34(1):116-22. doi: doi:10.1071/AH09674
- 24 47. Government of South Australia. Aboriginal Health Care Plan 2010-2016. Adelaide, SA:
- 25 Department of Health, Statewide Service Strategy Division, 2010.
- 26 48. Busby J, Purdy S, Hollingworth W. A systematic review of the magnitude and cause of geographic
- 27 variation in unplanned hospital admission rates and length of stay for ambulatory care
- 28 sensitive conditions. *BMC Health Services Research* 2015;15(1):1-15. doi: 10.1186/s12913-
- 29 015-0964-3
- 30 49. Guo MW, Ahn HJ, Juarez DT, et al. Length of Stay and Deaths in Diabetes-Related Preventable
- 31 Hospitalizations Among Asian American, Pacific Islander, and White Older Adults on
- 32 Medicare, Hawai'i, December 2006–December 2010. *Preventing Chronic Disease*
- 33 2015;12:E124. doi: 10.5888/pcd12.150092
- 34 50. Banham D, Jury H, Woollacott T, et al. Aboriginal premature mortality within South Australia
- 35 1999-2006: a cross-sectional analysis of small area results. *BMC Public Health*
- 36 2011;11(1):286.
- 37 51. Pawson R, Greenhalgh J, Brennan C, et al. Do reviews of healthcare interventions teach us how
- 38 to improve healthcare systems? *Social Science & Medicine* 2014;114(0):129-37. doi:
- 39 <http://dx.doi.org/10.1016/j.socscimed.2014.05.032>
- 40 52. Australian Institute of Health and Welfare. Admitted patient care: Australian hospital statistics
- 41 2013–14. Canberra: AIHW, 2015.
- 42 53. Thompson SC, Woods JA, Katzenellenbogen JM. The quality of Indigenous identification in
- 43 administrative health data in Australia: insights from studies using data linkage. *BMC*
- 44 *Medical Informatics and Decision Making* 2012;12(1):133. doi: 10.1186/1472-6947-12-133
- 45 54. Australian Bureau of Statistics. Estimates and Projections, Aboriginal and Torres Strait Islander
- 46 Australians: 2001 to 2026. Canberra: ABS, 2014.
- 47 55. Australian Bureau of Statistics. Statistical Geography Volume 1 - Australian Standard
- 48 Geographical Classification (ASGC). Canberra: ABS, 2006.
- 49 56. Australian Bureau of Statistics. Population Estimates by Age and Sex, Australia by Geographical
- 50 Classification [ASGC 2011]. 31 August, 2012 ed: Australian Bureau of Statistics, 2012.
- 51 57. Australian Bureau of Statistics. An introduction to Socio-Economic Indexes for Areas (SEIFA),
- 52 2006. Information Paper. Canberra: ABS, 2008.
- 53
- 54
- 55
- 56
- 57
- 58
- 59
- 60

- 1
- 2
- 3 58. Australian Bureau of Statistics. Socio-Economic Indexes for Areas (SEIFA) - Technical Paper, 2011,
- 4 2013.
- 5 59. Berry J, Harrison J. A guide to statistical methods for injury surveillance. Revised ed. Adelaide:
- 6 AIHW, 2005.
- 7 60. Australian Bureau of Statistics. National Aboriginal and Torres Strait Islander health survey 2004-
- 8 05. Canberra, ACT: Australian Bureau of Statistics, 2006.
- 9 61. Australian Bureau of Statistics. ASGC Remoteness Classification: Purpose and Use. Canberra: ABS,
- 10 2003.
- 11 62. Delaney JA, Seeger JD. Sensitivity analysis. In: Velentgas P, Dreyer N, Nourjah P, et al., eds.
- 12 Developing a Protocol for Observational Comparative Effectiveness Research: A User's
- 13 Guide. Rockville, MD: Agency for Healthcare Research and Quality 2013.
- 14 63. Stata Statistical Software: Release 14.2 [program]. College Station, TX: StataCorp LP, 2015.
- 15 64. Australian Institute of Health and Welfare. Admitted patient care: Australian hospital statistics
- 16 2014–15. Canberra: AIHW, 2016.
- 17 65. Mukamel DBP, Ladd HMS, Li YP, et al. Have Racial Disparities in Ambulatory Care Sensitive
- 18 Admissions Abated Over Time? *Medical Care* 2015;53(11):931-39.
- 19 66. Passey M, Longman J, Johnston J, et al. Diagnosing Potentially Preventable Hospitalisations
- 20 (DaPPHne): Protocol for a mixed-methods data-linkage study. *BMJ Open* 2015;5(e009879)
- 21 doi: doi:10.1136/bmjopen-2015-009879
- 22 67. Falster MO, Jorm LR, Douglas KA, et al. Sociodemographic and Health Characteristics, Rather
- 23 Than Primary Care Supply, are Major Drivers of Geographic Variation in Preventable
- 24 Hospitalizations in Australia. *Medical Care* 2015;53(5):436-45.
- 25 68. Busby J, Purdy S, Hollingworth W. Using geographic variation in unplanned ambulatory care
- 26 sensitive condition admission rates to identify commissioning priorities: an analysis of
- 27 routine data from England. *Journal of Health Services Research & Policy* 2016 doi:
- 28 10.1177/1355819616666397
- 29 69. Banham D, Jury H, Woollacott T, et al. Aboriginal premature mortality within South Australia
- 30 1999-2006: a cross-sectional analysis of small area results. *BMC Public Health* 2011;11(286)
- 31 doi: doi:10.1186/1471-2458-11-286
- 32 70. Gibson OR, Segal L. Limited evidence to assess the impact of primary health care system or
- 33 service level attributes on health outcomes of Indigenous people with type 2 diabetes: a
- 34 systematic review. *BMC Health Services Research* 2015;15:154. doi: 10.1186/s12913-015-
- 35 0803-6
- 36 71. McDermott RA, Schmidt B, Preece C, et al. Community health workers improve diabetes care in
- 37 remote Australian Indigenous communities: results of a pragmatic cluster randomized
- 38 controlled trial. *BMC Health Services Research* 2015;15(1):68. doi: 10.1186/s12913-015-
- 39 0695-5
- 40 72. Segal L, Nguyen H, Schmidt B, et al. Economic evaluation of Indigenous health worker
- 41 management of poorly controlled type 2 diabetes in north Queensland. *Med J Aust*
- 42 2016;204(5):1961e-9.
- 43 73. Brown A, Kritharides L. Overcoming cardiovascular disease in Indigenous Australians. *Med J Aust*
- 44 2017;206(1):10-12.
- 45 74. Australian Bureau of Statistics. Census of Population and Housing: Socio-Economic Indexes for
- 46 Areas (SEIFA), Australia - Data only, 2011, 2013.
- 47
- 48
- 49
- 50
- 51
- 52
- 53
- 54
- 55
- 56
- 57
- 58
- 59
- 60

**Table 1 Persons, percent, and rates of chronic PPH in South Australian public hospitals, 2005-06 to 2010-11.**

|                               | Aboriginal |        |                           | non-Aboriginal |        |                           |
|-------------------------------|------------|--------|---------------------------|----------------|--------|---------------------------|
|                               | N          | %      | Persons per 1000 per year | N              | %      | Persons per 1000 per year |
| Chronic PPH                   | 1,892      | 100.0% | 11.5                      | 58,316         | 100.0% | 6.2                       |
| Conditions <sup>^</sup>       |            |        |                           |                |        |                           |
| Angina                        | 293        | 15.5%  | 1.8                       | 10,587         | 18.2%  | 1.1                       |
| Asthma                        | 528        | 27.9%  | 3.2                       | 12,346         | 21.2%  | 1.3                       |
| COPD                          | 341        | 18.0%  | 2.1                       | 11,930         | 20.5%  | 1.3                       |
| Congestive cardiac failure    | 221        | 11.7%  | 1.4                       | 11,079         | 19.0%  | 1.2                       |
| Diabetes complications        | 700        | 37.0%  | 4.3                       | 12,574         | 21.6%  | 1.3                       |
| Hypertension                  | 79         | 4.2%   | 0.5                       | 2,199          | 3.8%   | 0.2                       |
| Iron Deficiency Anaemia       | 107        | 5.7%   | 0.7                       | 4,974          | 8.5%   | 0.5                       |
| Nutritional deficiencies      | 0          | 0.0%   | 0.0                       | 62             | 0.1%   | 0.0                       |
| Rheumatic heart disease       | 42         | 2.2%   | 0.3                       | 592            | 1.0%   | 0.1                       |
| Gender                        |            |        |                           |                |        |                           |
| Male                          | 860        | 45.5%  | 10.6                      | 29,970         | 51.4%  | 6.5                       |
| Female                        | 1,032      | 54.5%  | 12.4                      | 28,346         | 48.6%  | 6.0                       |
| Age                           |            |        |                           |                |        |                           |
| 0-4                           | 167        | 8.8%   | 8.6                       | 4,148          | 7.1%   | 8.1                       |
| 5-14                          | 137        | 7.2%   | 3.5                       | 3,775          | 6.5%   | 3.4                       |
| 15-24                         | 92         | 4.9%   | 2.7                       | 1,691          | 2.9%   | 1.4                       |
| 25-34                         | 115        | 6.1%   | 5.0                       | 1,531          | 2.6%   | 1.3                       |
| 35-44                         | 264        | 14.0%  | 13.1                      | 2,452          | 4.2%   | 1.9                       |
| 45-54                         | 429        | 22.7%  | 28.8                      | 4,211          | 7.2%   | 3.2                       |
| 55-64                         | 355        | 18.8%  | 44.2                      | 6,714          | 11.5%  | 5.8                       |
| 65-74                         | 223        | 11.8%  | 61.0                      | 9,583          | 16.4%  | 12.7                      |
| 75+                           | 110        | 5.8%   | 59.7                      | 24,211         | 41.5%  | 32.8                      |
| Area Disadvantage (2011 IRSD) |            |        |                           |                |        |                           |
| Q1 Least Disadvantage         | 31         | 1.6%   | 3.7                       | 6,298          | 10.8%  | 3.4                       |
| Q2                            | 128        | 6.8%   | 7.7                       | 10,799         | 18.5%  | 5.1                       |
| Q3                            | 159        | 8.4%   | 7.6                       | 10,918         | 18.7%  | 6.6                       |
| Q4                            | 551        | 29.1%  | 11.6                      | 17,739         | 30.4%  | 7.4                       |
| Q5 Most Disadvantage          | 1,023      | 54.1%  | 14.5                      | 15,562         | 26.7%  | 8.9                       |
| Area Remoteness (ARIA+)       |            |        |                           |                |        |                           |
| Major cities                  | 677        | 35.8%  | 8.0                       | 37,532         | 64.4%  | 5.6                       |
| Regional                      | 813        | 43.0%  | 13.7                      | 18,329         | 31.4%  | 7.7                       |
| Remote                        | 402        | 21.2%  | 19.4                      | 2,455          | 4.2%   | 7.7                       |

<sup>^</sup>Subtotals of N=2,311 and 66,343 respectively. Does not round to 100% as chronic PPH can include more than one condition

**Table 2 Mean number of separations, total LOS and hospital cost associated with chronic PPH in South Australian public hospitals, 2005-06 to 2010-11**

|                               | Number of chronic PPH |         |                |         | LOS for chronic PPH |           |                |           | Costs of chronic PPH |                   |                |                   |
|-------------------------------|-----------------------|---------|----------------|---------|---------------------|-----------|----------------|-----------|----------------------|-------------------|----------------|-------------------|
|                               | Aboriginal            |         | non-Aboriginal |         | Aboriginal          |           | non-Aboriginal |           | Aboriginal           |                   | non-Aboriginal |                   |
|                               | Mean                  | 95% CIs | Mean           | 95% CIs | Mean                | 95% CIs   | Mean           | 95% CIs   | Mean                 | 95% CIs           | Mean           | 95% CIs           |
| Chronic PPH                   | 2.6                   | 2.4-2.8 | 1.9            | 1.9-1.9 | 11.7                | 10.6-12.7 | 9.0            | 8.9-9.2   | \$ 17,928            | \$16,367-\$19,490 | \$ 11,515      | \$11,344-\$11,686 |
| Conditions                    |                       |         |                |         |                     |           |                |           |                      |                   |                |                   |
| Diabetes complications        | 2.4                   | 2.1-2.6 | 1.8            | 1.8-1.9 | 13.3                | 11.7-15.0 | 10.0           | 9.7-10.3  | \$ 20,665            | \$18,253-\$23,077 | \$ 14,601      | \$14,172-\$15,031 |
| Other than diabetes           | 2.4                   | 2.2-2.6 | 1.8            | 1.8-1.9 | 9.2                 | 8.1-10.3  | 8.3            | 8.1-8.4   | \$ 14,074            | \$12,416-\$15,733 | \$ 10,083      | \$9,916-\$10,250  |
| Gender                        |                       |         |                |         |                     |           |                |           |                      |                   |                |                   |
| Male                          | 2.7                   | 2.5-3.0 | 1.9            | 1.9-2.0 | 12.2                | 10.7-13.7 | 9.1            | 8.9-9.3   | \$ 18,895            | \$16,794-\$20,997 | \$ 11,993      | \$11,749-\$12,237 |
| Female                        | 2.5                   | 2.3-2.8 | 1.9            | 1.9-1.9 | 11.2                | 9.7-12.7  | 9.0            | 8.7-9.2   | \$ 17,121            | \$14,856-\$19,386 | \$ 11,009      | \$10,769-\$11,249 |
| Age                           |                       |         |                |         |                     |           |                |           |                      |                   |                |                   |
| 0-4                           | 1.5                   | 1.3-1.6 | 1.6            | 1.5-1.6 | 2.9                 | 2.3-3.4   | 2.5            | 2.4-2.6   | \$ 5,000             | \$3,743-\$6,256   | \$ 4,178       | \$4,041-\$4,315   |
| 5-14                          | 2.1                   | 1.7-2.5 | 1.9            | 1.8-1.9 | 4.6                 | 3.3-6.0   | 3.7            | 3.4-3.9   | \$ 6,700             | \$5,232-\$8,168   | \$ 5,775       | \$5,499-\$6,051   |
| 15-24                         | 1.9                   | 1.2-2.5 | 2.1            | 1.9-2.2 | 6.3                 | 4.0-8.7   | 4.9            | 4.3-5.5   | \$ 14,070            | \$8,113-\$20,028  | \$ 8,460       | \$7,524-\$9,396   |
| 25-34                         | 2.4                   | 1.5-3.3 | 1.7            | 1.6-1.8 | 11.0                | 5.8-16.2  | 4.0            | 3.6-4.4   | \$ 18,513            | \$9,779-\$27,247  | \$ 6,339       | \$5,767-\$6,910   |
| 35-44                         | 2.2                   | 1.9-2.5 | 1.7            | 1.6-1.9 | 10.1                | 7.9-12.4  | 6.1            | 4.9-7.3   | \$ 15,854            | \$12,503-\$19,206 | \$ 9,220       | \$7,878-\$10,562  |
| 45-54                         | 2.7                   | 2.4-3.1 | 1.7            | 1.7-1.8 | 12.0                | 9.9-14.1  | 7.3            | 6.6-7.9   | \$ 19,096            | \$15,989-\$22,202 | \$ 10,623      | \$9,809-\$11,438  |
| 55-64                         | 3.2                   | 2.6-3.8 | 1.9            | 1.8-2.0 | 14.9                | 12.0-17.8 | 8.9            | 8.4-9.3   | \$ 24,023            | \$19,306-\$28,740 | \$ 12,291      | \$11,696-\$12,886 |
| 65-74                         | 3.4                   | 2.8-4.1 | 2.0            | 2.0-2.1 | 18.6                | 14.1-23.0 | 10.5           | 10.1-10.9 | \$ 25,820            | \$20,512-\$31,128 | \$ 13,940      | \$13,440-\$14,441 |
| 75+                           | 2.8                   | 2.1-3.4 | 2.0            | 2.0-2.0 | 17.1                | 11.7-22.6 | 11.7           | 11.5-11.9 | \$ 19,258            | \$13,985-\$24,532 | \$ 13,420      | \$13,189-\$13,651 |
| Area Disadvantage (2011 IRSD) |                       |         |                |         |                     |           |                |           |                      |                   |                |                   |
| Q1 Least Disadvantage         | 2.4                   | 1.4-3.3 | 1.8            | 1.7-1.8 | 7.1                 | 3.3-10.8  | 7.9            | 7.5-8.3   | \$ 12,481            | \$4,338-\$20,624  | \$ 9,908       | \$9,474-\$10,341  |
| Q2                            | 2.5                   | 2.0-3.1 | 1.8            | 1.8-1.9 | 10.1                | 7.0-13.2  | 8.8            | 8.4-9.2   | \$ 15,995            | \$10,932-\$21,058 | \$ 11,176      | \$10,728-\$11,625 |
| Q3                            | 2.4                   | 1.9-3.0 | 1.9            | 1.9-2.0 | 12.3                | 7.9-16.8  | 9.5            | 9.1-9.8   | \$ 16,776            | \$11,410-\$22,142 | \$ 11,788      | \$11,389-\$12,186 |
| Q4                            | 2.5                   | 2.2-2.8 | 1.9            | 1.9-1.9 | 10.7                | 9.0-12.5  | 8.9            | 8.6-9.1   | \$ 17,228            | \$14,710-\$19,746 | \$ 11,372      | \$11,053-\$11,691 |
| Q5 Most Disadvantage          | 2.8                   | 2.5-3.0 | 2.1            | 2.0-2.1 | 12.4                | 10.8-14.0 | 9.5            | 9.2-9.8   | \$ 18,503            | \$16,208-\$20,798 | \$ 12,351      | \$12,012-\$12,689 |
| Area Remoteness (ARIA+)       |                       |         |                |         |                     |           |                |           |                      |                   |                |                   |
| Major cities                  | 2.5                   | 2.2-2.8 | 1.9            | 1.9-2.0 | 10.8                | 9.0-12.6  | 9.3            | 9.2-9.5   | \$ 16,918            | \$14,110-\$19,727 | \$ 11,892      | \$11,667-\$12,116 |
| Regional                      | 2.7                   | 2.4-3.0 | 1.9            | 1.9-1.9 | 11.7                | 10.0-13.4 | 8.5            | 8.2-8.7   | \$ 16,575            | \$14,413-\$18,737 | \$ 10,753      | \$10,481-\$11,024 |
| Remote                        | 2.7                   | 2.3-3.1 | 1.8            | 1.7-1.9 | 13.1                | 10.8-15.4 | 8.5            | 7.9-9.1   | \$ 21,377            | \$17,931-\$24,824 | \$ 11,490      | \$10,673-\$12,307 |

**Table 3 Relationship of SLA area attributes with square root transformed public hospital standardised LOS and cost ratios by Aboriginality in South Australia, 2005-06 to 2010-11**

| LOS                                             | Aboriginal          |            |        |          | non-Aboriginal      |           |        |          |
|-------------------------------------------------|---------------------|------------|--------|----------|---------------------|-----------|--------|----------|
|                                                 | Change co-efficient | 95%CI      | p      | N (SLAs) | Change co-efficient | 95%CI     | p      | N (SLAs) |
| Chronic PPH                                     |                     |            |        | 118      |                     |           |        | 119      |
| Constant                                        | 2.09                | 0.00-5.83  | <0.001 |          | 0.46                | 0.38-0.54 | <0.001 |          |
| Area disadvantage rank (2011 IRSD) <sup>a</sup> | 0.03                | 0.00-0.07  | 0.005  |          | 0.01                | 0.01-0.01 | <0.001 |          |
| Area remoteness (ARIA+) <sup>b</sup>            | 1.04                | 0.63-1.44  | <0.001 |          | 0.02                | 0.00-0.04 | 0.183  |          |
| Diabetes complications PPH                      |                     |            |        |          |                     |           |        |          |
| Constant                                        | 2.59                | 0.00-10.82 | 0.003  |          | 0.41                | 0.31-0.52 | <0.001 |          |
| Area disadvantage rank (2011 IRSD) <sup>a</sup> | 0.05                | 0.00-0.15  | 0.005  |          | 0.01                | 0.01-0.01 | <0.001 |          |
| Area remoteness (ARIA+) <sup>b</sup>            | 1.62                | 0.73-2.51  | <0.001 |          | 0.02                | 0.00-0.05 | 0.225  |          |
| Other chronic PPH                               |                     |            |        |          |                     |           |        |          |
| Constant                                        | 1.86                | 0.00-5.45  | <0.001 |          | 0.48                | 0.39-0.56 | <0.001 |          |
| Area disadvantage rank (2011 IRSD) <sup>a</sup> | 0.02                | 0.00-0.06  | 0.004  |          | 0.01                | 0.01-0.01 | <0.001 |          |
| Area remoteness (ARIA+) <sup>b</sup>            | 0.82                | 0.43-1.21  | <0.001 |          | 0.01                | 0.00-0.04 | 0.258  |          |
| <b>Cost</b>                                     |                     |            |        |          |                     |           |        |          |
| Chronic PPH                                     |                     |            |        |          |                     |           |        |          |
| Constant                                        | 2.44                | 0.00-5.92  | <0.001 |          | 0.44                | 0.36-0.51 | <0.001 |          |
| Area disadvantage rank (2011 IRSD) <sup>a</sup> | 0.02                | 0.00-0.06  | 0.008  |          | 0.01                | 0.01-0.01 | <0.001 |          |
| Area remoteness (ARIA+) <sup>b</sup>            | 1.18                | 0.80-1.55  | <0.001 |          | 0.02                | 0.00-0.04 | 0.078  |          |
| Diabetes complications PPH                      |                     |            |        |          |                     |           |        |          |
| Constant                                        | 3.95                | 0.00-10.88 | <0.001 |          | 0.40                | 0.30-0.50 | <0.001 |          |
| Area disadvantage rank (2011 IRSD) <sup>a</sup> | 0.03                | 0.00-0.12  | 0.006  |          | 0.01                | 0.01-0.01 | <0.001 |          |
| Area remoteness (ARIA+) <sup>b</sup>            | 1.43                | 0.68-2.18  | <0.001 |          | 0.02                | 0.00-0.05 | 0.258  |          |
| Other chronic PPH                               |                     |            |        |          |                     |           |        |          |
| Constant                                        | 1.74                | 0.77-5.40  | <0.001 |          | 0.45                | 0.37-0.53 | <0.001 |          |
| Area disadvantage rank (2011 IRSD) <sup>a</sup> | 0.02                | 0.00-0.06  | 0.005  |          | 0.01                | 0.01-0.01 | <0.001 |          |
| Area remoteness (ARIA+) <sup>b</sup>            | 1.08                | 0.69-1.48  | <0.001 |          | 0.02                | 0.00-0.04 | 0.090  |          |

<sup>a</sup> Change is per one unit increase in SLA disadvantage rank

<sup>b</sup> Change is per one unit increase in SLA ARIA+ score

Figure 1 Annual rate and mean number of chronic PPH to public hospitals by age and Aboriginality in South Australia, 2005-06 to 2010-11

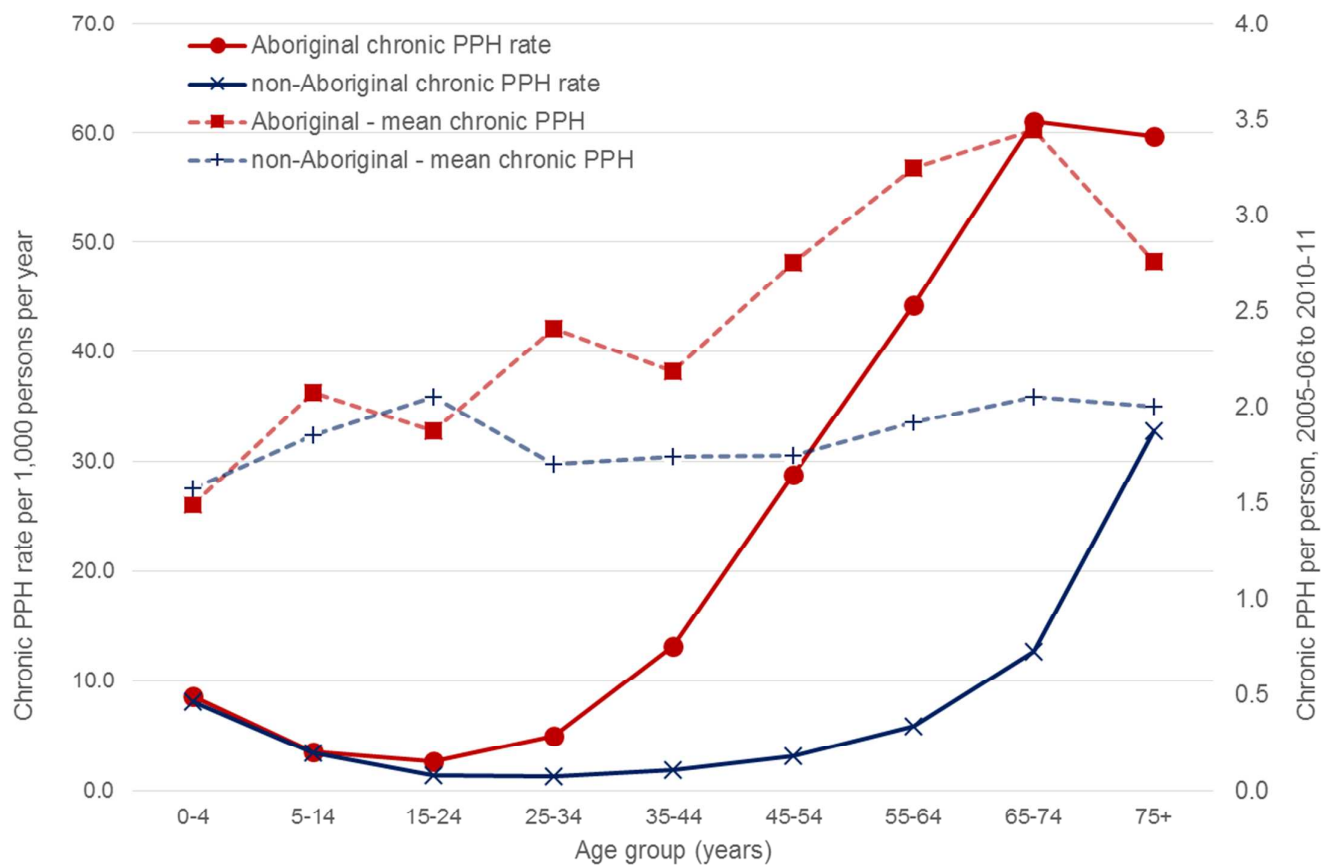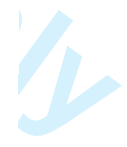

Figure 2 Sex and age adjusted public hospital LOS (Panel A) and costs (Panel B) for chronic PPH by Aboriginality in South Australia, 2005-06 to 2010-11

A. Length of stay

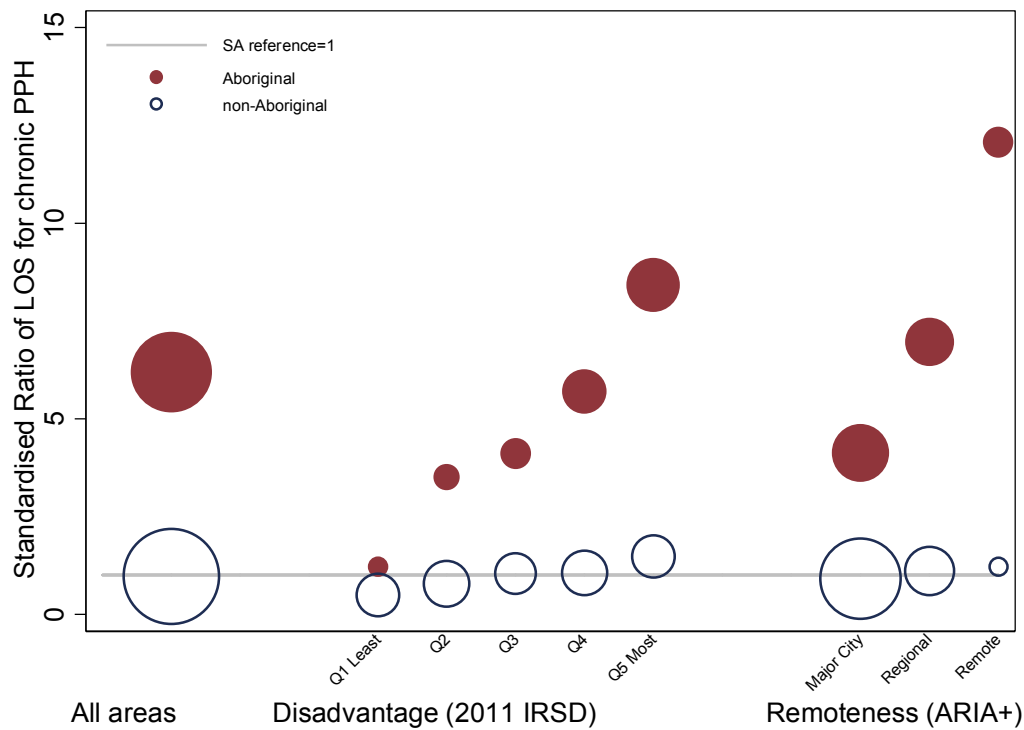

B. Costs

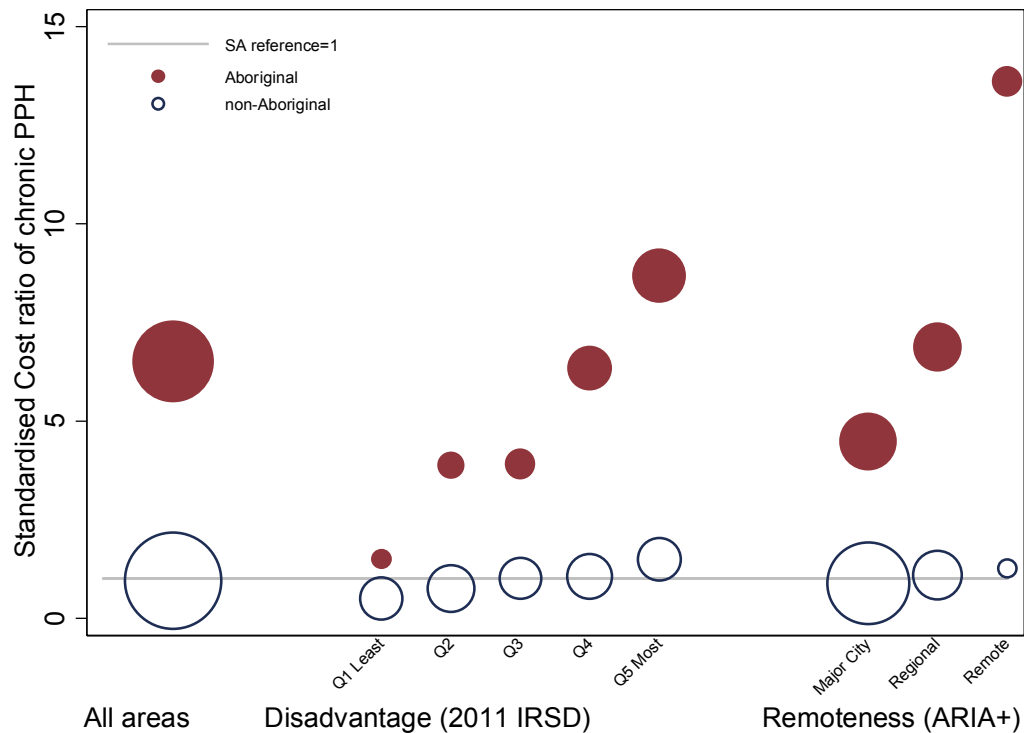

Supplemental Online Table A Distribution of population by area disadvantage, remoteness and Aboriginal status, South Australia, 2006 to 2011 average

| <b>Indigenous</b>             |                  |              |                |              |               |              |                  |               |
|-------------------------------|------------------|--------------|----------------|--------------|---------------|--------------|------------------|---------------|
|                               | Major cities     |              | Regional       |              | Remote        |              | Total            |               |
|                               | N                | Percent      | N              | Percent      | N             | Percent      | N                | Percent       |
| Age                           |                  |              |                |              |               |              |                  |               |
| 0-4                           | 1,656            | 6.1%         | 1,178          | 4.3%         | 403           | 1.5%         | 3,238            | 11.8%         |
| 5-14                          | 3,344            | 12.2%        | 2,335          | 8.5%         | 799           | 2.9%         | 6,479            | 23.7%         |
| 15-24                         | 3,046            | 11.1%        | 2,000          | 7.3%         | 679           | 2.5%         | 5,724            | 20.9%         |
| 25-34                         | 2,033            | 7.4%         | 1,322          | 4.8%         | 474           | 1.7%         | 3,828            | 14.0%         |
| 35-44                         | 1,675            | 6.1%         | 1,218          | 4.5%         | 463           | 1.7%         | 3,355            | 12.3%         |
| 45-54                         | 1,241            | 4.5%         | 884            | 3.2%         | 362           | 1.3%         | 2,487            | 9.1%          |
| 55-64                         | 633              | 2.3%         | 541            | 2.0%         | 164           | 0.6%         | 1,338            | 4.9%          |
| 65-74                         | 279              | 1.0%         | 258            | 0.9%         | 72            | 0.3%         | 609              | 2.2%          |
| 75+                           | 150              | 0.5%         | 126            | 0.5%         | 32            | 0.1%         | 307              | 1.1%          |
| Area Disadvantage (2011 IRSD) |                  |              |                |              |               |              |                  |               |
| Q1 Least Disadvantage         | 1,051            | 3.8%         | 257            | 0.9%         | 97            | 0.4%         | 1,406            | 5.1%          |
| Q2                            | 2,154            | 7.9%         | 483            | 1.8%         | 144           | 0.5%         | 2,781            | 10.2%         |
| Q3                            | 2,517            | 9.2%         | 815            | 3.0%         | 140           | 0.5%         | 3,472            | 12.7%         |
| Q4                            | 3,588            | 13.1%        | 2,137          | 7.8%         | 2,220         | 8.1%         | 7,945            | 29.0%         |
| Q5 Most Disadvantage          | 4,746            | 17.3%        | 6,170          | 22.5%        | 846           | 3.1%         | 11,762           | 43.0%         |
| <b>Total</b>                  | <b>14,056</b>    | <b>51.4%</b> | <b>9,862</b>   | <b>36.0%</b> | <b>3,448</b>  | <b>12.6%</b> | <b>27,366</b>    | <b>100.0%</b> |
| <b>non-Indigenous</b>         |                  |              |                |              |               |              |                  |               |
|                               | Major cities     |              | Regional       |              | Remote        |              | Total            |               |
|                               | N                | Percent      | N              | Percent      | N             | Percent      | N                | Percent       |
| Age                           |                  |              |                |              |               |              |                  |               |
| 0-4                           | 59,436           | 3.8%         | 22,616         | 1.5%         | 3,438         | 0.2%         | 85,490           | 5.5%          |
| 5-14                          | 124,954          | 8.0%         | 52,155         | 3.3%         | 7,139         | 0.5%         | 184,249          | 11.8%         |
| 15-24                         | 157,384          | 10.1%        | 46,228         | 3.0%         | 5,791         | 0.4%         | 209,403          | 13.4%         |
| 25-34                         | 151,022          | 9.7%         | 42,991         | 2.8%         | 6,781         | 0.4%         | 200,794          | 12.9%         |
| 35-44                         | 152,948          | 9.8%         | 53,955         | 3.5%         | 7,691         | 0.5%         | 214,594          | 13.8%         |
| 45-54                         | 155,542          | 10.0%        | 58,966         | 3.8%         | 7,817         | 0.5%         | 222,326          | 14.3%         |
| 55-64                         | 131,546          | 8.4%         | 53,794         | 3.5%         | 6,979         | 0.4%         | 192,319          | 12.3%         |
| 65-74                         | 85,890           | 5.5%         | 35,964         | 2.3%         | 4,168         | 0.3%         | 126,022          | 8.1%          |
| 75+                           | 89,966           | 5.8%         | 29,574         | 1.9%         | 3,508         | 0.2%         | 123,049          | 7.9%          |
| Area Disadvantage (2011 IRSD) |                  |              |                |              |               |              |                  |               |
| Q1 Least Disadvantage         | 249,709          | 16.0%        | 51,252         | 3.3%         | 6,068         | 0.4%         | 307,029          | 19.7%         |
| Q2                            | 300,646          | 19.3%        | 57,501         | 3.7%         | 7,839         | 0.5%         | 365,986          | 23.5%         |
| Q3                            | 209,834          | 13.5%        | 64,390         | 4.1%         | 13,559        | 0.9%         | 287,783          | 18.5%         |
| Q4                            | 211,354          | 13.6%        | 105,166        | 6.7%         | 21,091        | 1.4%         | 337,611          | 21.7%         |
| Q5 Most Disadvantage          | 175,782          | 11.3%        | 122,500        | 7.9%         | 3,703         | 0.2%         | 301,985          | 19.4%         |
| <b>Total</b>                  | <b>1,108,690</b> | <b>71.1%</b> | <b>396,244</b> | <b>25.4%</b> | <b>53,312</b> | <b>3.4%</b>  | <b>1,558,246</b> | <b>100.0%</b> |



STROBE 2007 (v4) Statement—Checklist of items that should be included in reports of cross-sectional studies

| Section/Topic             | Item # | Recommendation                                                                                                                                                                       | Reported on page #                                          |
|---------------------------|--------|--------------------------------------------------------------------------------------------------------------------------------------------------------------------------------------|-------------------------------------------------------------|
| Title and abstract        | 1      | (a) Indicate the study’s design with a commonly used term in the title or the abstract                                                                                               | 1                                                           |
|                           |        | (b) Provide in the abstract an informative and balanced summary of what was done and what was found                                                                                  | 1&2                                                         |
| <b>Introduction</b>       |        |                                                                                                                                                                                      |                                                             |
| Background/rationale      | 2      | Explain the scientific background and rationale for the investigation being reported                                                                                                 | 2-6                                                         |
| Objectives                | 3      | State specific objectives, including any prespecified hypotheses                                                                                                                     | 6                                                           |
| <b>Methods</b>            |        |                                                                                                                                                                                      |                                                             |
| Study design              | 4      | Present key elements of study design early in the paper                                                                                                                              | 7                                                           |
| Setting                   | 5      | Describe the setting, locations, and relevant dates, including periods of recruitment, exposure, follow-up, and data collection                                                      | 7&8                                                         |
| Participants              | 6      | (a) Give the eligibility criteria, and the sources and methods of selection of participants                                                                                          | 7&8                                                         |
| Variables                 | 7      | Clearly define all outcomes, exposures, predictors, potential confounders, and effect modifiers. Give diagnostic criteria, if applicable                                             | 8&9                                                         |
| Data sources/ measurement | 8*     | For each variable of interest, give sources of data and details of methods of assessment (measurement). Describe comparability of assessment methods if there is more than one group | 7&8                                                         |
| Bias                      | 9      | Describe any efforts to address potential sources of bias                                                                                                                            | 8                                                           |
| Study size                | 10     | Explain how the study size was arrived at                                                                                                                                            | 7                                                           |
| Quantitative variables    | 11     | Explain how quantitative variables were handled in the analyses. If applicable, describe which groupings were chosen and why                                                         | 8&9                                                         |
| Statistical methods       | 12     | (a) Describe all statistical methods, including those used to control for confounding                                                                                                | 8&9                                                         |
|                           |        | (b) Describe any methods used to examine subgroups and interactions                                                                                                                  | 9                                                           |
|                           |        | (c) Explain how missing data were addressed                                                                                                                                          | N/A Study uses mandatory fields within administrative data. |

|                          |     |                                                                                                                                                                                                              |                                 |
|--------------------------|-----|--------------------------------------------------------------------------------------------------------------------------------------------------------------------------------------------------------------|---------------------------------|
|                          |     | (d) If applicable, describe analytical methods taking account of sampling strategy                                                                                                                           | N/A                             |
|                          |     | (e) Describe any sensitivity analyses                                                                                                                                                                        | 8&9                             |
| <b>Results</b>           |     |                                                                                                                                                                                                              |                                 |
| Participants             | 13* | (a) Report numbers of individuals at each stage of study—eg numbers potentially eligible, examined for eligibility, confirmed eligible, included in the study, completing follow-up, and analysed            | 10                              |
|                          |     | (b) Give reasons for non-participation at each stage                                                                                                                                                         | N/A                             |
|                          |     | (c) Consider use of a flow diagram                                                                                                                                                                           | Not considered appropriate      |
| Descriptive data         | 14* | (a) Give characteristics of study participants (eg demographic, clinical, social) and information on exposures and potential confounders                                                                     | 10                              |
|                          |     | (b) Indicate number of participants with missing data for each variable of interest                                                                                                                          | N/A                             |
| Outcome data             | 15* | Report numbers of outcome events or summary measures                                                                                                                                                         | 9                               |
| Main results             | 16  | (a) Give unadjusted estimates and, if applicable, confounder-adjusted estimates and their precision (eg, 95% confidence interval). Make clear which confounders were adjusted for and why they were included | 9&10                            |
|                          |     | (b) Report category boundaries when continuous variables were categorized                                                                                                                                    | Defined p8;<br>Reported pp10-13 |
|                          |     | (c) If relevant, consider translating estimates of relative risk into absolute risk for a meaningful time period                                                                                             | N/A                             |
| Other analyses           | 17  | Report other analyses done—eg analyses of subgroups and interactions, and sensitivity analyses                                                                                                               | 10-13                           |
| <b>Discussion</b>        |     |                                                                                                                                                                                                              |                                 |
| Key results              | 18  | Summarise key results with reference to study objectives                                                                                                                                                     | 13-14                           |
| Limitations              | 19  | Discuss limitations of the study, taking into account sources of potential bias or imprecision. Discuss both direction and magnitude of any potential bias                                                   | 17                              |
| Interpretation           | 20  | Give a cautious overall interpretation of results considering objectives, limitations, multiplicity of analyses, results from similar studies, and other relevant evidence                                   | 14-16                           |
| Generalisability         | 21  | Discuss the generalisability (external validity) of the study results                                                                                                                                        | 15-16                           |
| <b>Other information</b> |     |                                                                                                                                                                                                              |                                 |
| Funding                  | 22  | Give the source of funding and the role of the funders for the present study and, if applicable, for the original study on which the present article is based                                                | 19                              |

\*Give information separately for cases and controls in case-control studies and, if applicable, for exposed and unexposed groups in cohort and cross-sectional studies.

1  
2  
3  
4  
5  
6  
7  
8  
9  
10  
11  
12  
13  
14  
15  
16  
17  
18  
19  
20  
21  
22  
23  
24  
25  
26  
27  
28  
29  
30  
31  
32  
33  
34  
35  
36  
37  
38  
39  
40  
41  
42  
43  
44  
45  
46  
47  
48  
49

**Note:** An Explanation and Elaboration article discusses each checklist item and gives methodological background and published examples of transparent reporting. The STROBE checklist is best used in conjunction with this article (freely available on the Web sites of PLoS Medicine at <http://www.plosmedicine.org/>, Annals of Internal Medicine at <http://www.annals.org/>, and Epidemiology at <http://www.epidem.com/>). Information on the STROBE Initiative is available at [www.strobe-statement.org](http://www.strobe-statement.org).

For peer review only

# BMJ Open

## Socio-demographic variations in the amount, duration and cost of potentially preventable hospitalisation for chronic conditions amongst Aboriginal and non-Aboriginal Australians: a period prevalence study of linked public hospital data

|                                 |                                                                                                                                                                                                                                                                                                                                                                                                                                                                                                                                                                                                                                                                                                                                          |
|---------------------------------|------------------------------------------------------------------------------------------------------------------------------------------------------------------------------------------------------------------------------------------------------------------------------------------------------------------------------------------------------------------------------------------------------------------------------------------------------------------------------------------------------------------------------------------------------------------------------------------------------------------------------------------------------------------------------------------------------------------------------------------|
| Journal:                        | <i>BMJ Open</i>                                                                                                                                                                                                                                                                                                                                                                                                                                                                                                                                                                                                                                                                                                                          |
| Manuscript ID                   | bmjopen-2017-017331.R1                                                                                                                                                                                                                                                                                                                                                                                                                                                                                                                                                                                                                                                                                                                   |
| Article Type:                   | Research                                                                                                                                                                                                                                                                                                                                                                                                                                                                                                                                                                                                                                                                                                                                 |
| Date Submitted by the Author:   | 05-Jul-2017                                                                                                                                                                                                                                                                                                                                                                                                                                                                                                                                                                                                                                                                                                                              |
| Complete List of Authors:       | Banham, David; The University of Adelaide, School of Public Health, Faculty of Health and Medical Sciences; South Australian Health and Medical Research Institute, Wardliparingga Aboriginal Health<br>Chen, Tenglong; The South Australian Health and Medical Research Institute, Wardliparingga Aboriginal Research Unit; Griffith University, School of Medical Science, Griffith Health<br>Karnon, Jon; The University of Adelaide, School of Public Health, Faculty of Health and Medical Sciences<br>Brown, Alex; The South Australian Health and Medical Research Institute, Wardliparingga Aboriginal Research Unit<br>Lynch, John; The University of Adelaide, School of Public Health, Faculty of Health and Medical Sciences |
| <b>Primary Subject Heading</b>: | Health services research                                                                                                                                                                                                                                                                                                                                                                                                                                                                                                                                                                                                                                                                                                                 |
| Secondary Subject Heading:      | Epidemiology, Health economics                                                                                                                                                                                                                                                                                                                                                                                                                                                                                                                                                                                                                                                                                                           |
| Keywords:                       | length of stay, hospital costs, potentially preventable hospitalisation, PRIMARY CARE, Indigenous population                                                                                                                                                                                                                                                                                                                                                                                                                                                                                                                                                                                                                             |
|                                 |                                                                                                                                                                                                                                                                                                                                                                                                                                                                                                                                                                                                                                                                                                                                          |

SCHOLARONE™  
Manuscripts

1  
2  
3 **Title: Socio-demographic variations in the amount, duration and cost of**  
4 **potentially preventable hospitalisation for chronic conditions amongst**  
5 **Aboriginal and non-Aboriginal Australians: a period prevalence study of**  
6 **linked public hospital data**  
7  
8  
9  
10  
11  
12

13 David Banham<sup>a b \*</sup>

14 Tenglong (Tien) Chen<sup>b c</sup>,

15 Jonathan Karnon<sup>a</sup>,

16 Alex Brown<sup>b</sup>

17 John Lynch<sup>a</sup>

18  
19  
20  
21  
22  
23  
24  
25  
26  
27  
28 <sup>a</sup> School of Public Health, Faculty of Health and Medical Sciences, The University of  
29 Adelaide, Adelaide, SA, Australia

30  
31  
32  
33 <sup>b</sup> Wardliparingga Aboriginal Research Unit, The South Australian Health and Medical  
34 Research Institute, North Terrace, Adelaide, SA, 5000

35  
36  
37  
38 <sup>c</sup> School of Medical Science, Griffith Health, Griffith University, Gold Coast, Qld, Australia

39  
40  
41  
42  
43  
44  
45  
46  
47  
48  
49  
50  
51  
52  
53  
54  
55  
56  
57  
58  
59  
60  
<sup>\*</sup> Corresponding author at: School of Public Health, Faculty of Health and Medical Sciences,  
The University of Adelaide, North Terrace, Adelaide, SA, 5000, Australia.

Email: david.banham@adelaide.edu.au.

Phone: +61 8 8128 4252

**Word count:** 4481 words

**Keywords:** potentially preventable hospitalisation; length of stay; hospital costs; primary care; Indigenous population.

## Abstract

### Objectives:

To determine disparities in rates, length of stay and hospital costs of potentially preventable hospitalisations (PPH) for selected chronic conditions among Aboriginal and non-Aboriginal South Australians (SA), then examine associations with area level socio-economic disadvantage and remoteness.

### Setting:

Period prevalence study using linked, administrative public hospital records.

### Participants:

Participants included all SA residents in 2005-06 to 2010-11. Analysis focused on those individuals experiencing chronic PPH as defined by the Australian Institute of Health and Welfare.

### Primary outcome measures:

Number and rates (unadjusted, then adjusted for sex and age) of chronic PPH, total length of stay (LOS) and direct hospital costs by Aboriginality.

### Results:

Aboriginal South Australians experienced higher risk of index chronic PPH compared to non-Aboriginals (11.5 and 6.2 per 1,000 persons per year respectively) and at younger ages (median age 48 versus 70 years). Once hospitalised, Aboriginal people experienced more chronic PPH events, longer total LOS with higher costs than non-Aboriginal people (2.6 versus 1.9 PPH per person; 11.7 versus 9.0 days LOS; at AUD\$17,928 versus AUD\$11,515 respectively). Compared to population average LOS, the standardised rate ratio of LOS among Aboriginal people increased by 0.03 (95%CI 0.00-0.07) as disadvantage rank increased and 1.04 (95%CI 0.63-1.44) as remoteness increased. Non-Aboriginal LOS also increased as disadvantage increased but at a lower rate, 0.01 (95%CI 0.01-0.01). Costs of Aboriginal chronic PPH increased by 0.02 (95%CI 0.00-0.06) for each increase in disadvantage and 1.18 (95%CI 0.80-1.55) for increased remoteness. Non-Aboriginal costs also increased as disadvantage increased but at lower rates, 0.01 (95%CI 0.01-0.01).

**Conclusion:**

Aboriginal people's heightened risk of chronic PPH resulted in more time in hospital and greater cost. Systematic disparities in chronic PPH by Aboriginality, area disadvantage and remoteness highlight the need for improved uptake of effective primary care. Routine, regional reporting will help monitor progress in meeting these population needs.

**Strengths and limitations of this study:**

- This is the first study to examine variations of total length of stay and direct hospital costs associated with chronic PPH among Aboriginal and non-Aboriginal Australians.
- The study uses a complete collection of person-linked public hospital records over a six year period from 2005-06 to 2010-2011.
- The study provides a baseline for reporting of a health system performance measure focussing on individuals as well as populations experiencing chronic PPH.
- Person-linked private hospital records and death records were not available to the study.
- Hospital records for a group of the most vulnerable residents living in very remote areas and hospitalised in other jurisdictions were not included.

## Background

Chronic health conditions are increasingly important contributors to poor population health throughout the world<sup>1</sup>. The increased prevalence and duration of these conditions adds to the mounting pressure on health systems to respond to those needs. Hospital expenditures are a key component of these systems<sup>2</sup>. Australia is an example of a developed and advantaged setting where annual hospital expenditure represents the largest recurrent and growing contribution<sup>3 4</sup> to the average health expenditure of \$6,639 per person<sup>5</sup>.

In constrained budgetary environments, hospital performance measures are constantly scrutinised for efficiency gains. For example, inpatient length of stay (LOS) is closely associated with hospital cost<sup>6</sup> and reimbursements<sup>7</sup> and Australia employs LOS in a suite of health system performance measures<sup>3 8</sup>. From a hospital's perspective, LOS indicates production of care adequate to meet clinical need while maximising bed availability and minimising treatment costs. From a patient perspective, hospital LOS means maximising quality outcomes from care while minimising risk of exposure to adverse events in hospital and time away from usual, societal roles.

Potentially Preventable Hospitalisations (PPH) are another performance indicator making use of administrative data<sup>9-11</sup>. Under different names such as potentially avoidable hospitalisations or ambulatory care sensitive conditions, and with some variations in conditions and coding<sup>12-14</sup>, PPH are widely adopted as an indicator of a community's capacity to benefit from available and effective<sup>15-18</sup> primary health care by: "preventing the onset of an illness or condition, controlling an acute episodic illness or condition, or managing a chronic disease or condition" p163<sup>19</sup>. Primary health care is the second most expensive component of Australia's health system at almost \$55 billion annually<sup>4</sup>. Recent expert commentary argued



1  
2  
3 Australia's primary health system provides around half the level of care recommended for  
4 chronic conditions which contributes to chronic PPH \$2 billion annual cost to the health  
5 system<sup>20</sup>. Therefore, PPH provide an important junction between two critical system  
6 components in which policy makers and health planners can consider both the technical  
7 efficiency of one sector, its effect on another sector and opportunities to adjust allocations  
8 across sectors. Efficient use of healthcare resources can maximise health outcomes in the  
9 community served<sup>21</sup>.

10  
11  
12  
13  
14  
15  
16  
17  
18  
19  
20  
21 Equitable distribution of health is another challenging<sup>21-24</sup> but high priority<sup>21</sup> for  
22 contemporary health systems. PPH result from a complex interplay of person-related<sup>25 26</sup>,  
23 health system, geographical<sup>27</sup> and socio-economic factors<sup>28-30</sup> which highlight the need for  
24 directing resources toward appropriate and accessible health services<sup>24</sup>. Localised  
25 understanding can help inform local responses to health need<sup>21 31</sup>. While their underlying data  
26 does not refer to individuals, Australia's Institute of Health and Welfare (AIHW) does work  
27 towards this by reporting aggregated PPH time series by age group, sex, state/territory  
28 jurisdictions, socioeconomic disadvantage, remoteness and Aboriginal and Torres Strait  
29 Islander status (herein respectively referred to as "Aboriginal")<sup>32</sup>. Overall PPH rates are three  
30 times higher for the Aboriginal population compared to non-Aboriginal Australians<sup>32 33</sup> which  
31 supports their designation as a disadvantaged group in terms of their use of primary health  
32 care<sup>34</sup>. This is consistent with indigenous population comparisons in the US<sup>35</sup>, Canada<sup>36</sup> and  
33 New Zealand<sup>37</sup>. Chronic PPH conditions account for much of PPH for which there is a five-  
34 fold differences in the hospitalisation rates by Aboriginality<sup>32 33</sup>. Australian reporting of  
35 chronic PPH conditions<sup>9</sup> focusses on primary diagnoses of: angina, asthma, COPD,  
36 congestive cardiac failure, diabetes complications, hypertension, iron deficiency anaemia,  
37 nutritional deficiencies and rheumatic heart disease (specific diagnosis and procedural criteria  
38  
39  
40  
41  
42  
43  
44  
45  
46  
47  
48  
49  
50  
51  
52  
53  
54  
55  
56  
57  
58  
59  
60

1  
2  
3 for chronic PPH are listed in Supplemental Online Table A). While the indicator could be  
4 further developed by including other conditions such as chronic kidney disease<sup>38</sup>, discrete  
5 chronic PPH conditions currently reported for angina, COPD<sup>38</sup>, congestive cardiac failure<sup>39 40</sup>  
6 and rheumatic heart disease<sup>41</sup> are each associated with disparities between Aboriginal and  
7 non-Aboriginal populations. A particularly significant area is that of PPH from diabetes  
8 complications, the most frequently reported chronic PPH amongst Aboriginal Australians<sup>32 42-</sup>  
9  
10  
11  
12  
13  
14  
15  
16  
17  
18  
19  
20  
21  
22  
23  
24  
25  
26  
27  
28  
29  
30  
31  
32  
33  
34  
35  
36  
37  
38  
39  
40  
41  
42  
43  
44  
45  
46  
47  
48  
49  
50  
51  
52  
53  
54  
55  
56  
57  
58  
59  
60

45. Similar disparities in chronic PPH between Aboriginal and non-Aboriginal populations are reported across Australia's states and territories of Victoria<sup>45</sup>, the Northern Territory<sup>44</sup>, Queensland<sup>46</sup>, Western Australia<sup>47</sup>, New South Wales<sup>48</sup> and South Australia (SA)<sup>49 50</sup>.

Despite considerable evidence of variations in PPH rates and LOS, relatively little is known about how the two measures co-vary<sup>51</sup>. Given the extent of disparities in chronic PPH rates by Aboriginality, this appears an opportune place from which to improve understanding of *who* in the community is more likely to experience potentially unnecessary, prolonged and costly hospitalisation. The first of only two studies that considered chronic PPH and LOS together focussed on diabetes hospitalisations among older, Hawaiian people categorised as either Asian, islander or white<sup>52</sup>. The second, Australian study considered results for individuals on the basis of Aboriginal identity<sup>48</sup>. The results affirmed higher chronic PPH rates among Aboriginal people compared to non-Aboriginal contemporaries of the same age, sex and living in the same geographic area. Moreover, elevated rates were accompanied by LOS which was 4% higher on average<sup>48</sup>. However, neither study explicitly describes the variation of chronic PPH and LOS rates within the populations studied, yet evidence in other areas point to considerable within-population heterogeneity in health outcomes. For example, analysis of premature mortality among Aboriginal South Australians showed an interaction

1  
2  
3 between area level socioeconomic disadvantage and remoteness where the social gradient  
4  
5 between disadvantage and premature mortality outcomes increased as remoteness increased<sup>53</sup>.  
6  
7

8  
9  
10 None of the recently reviewed literature on PPH and LOS analysed the costs associated with  
11  
12 the hospital events. Such information is critical to inform complex commissioning decisions  
13  
14 of the opportunity cost, at least from a health system perspective, of pursuing technical and  
15  
16 allocative efficiencies while reducing the human and societal costs represented by a person's  
17  
18 time out of role.  
19

20  
21  
22  
23 If health systems are to attend to the needs of people and populations, it is important to focus  
24  
25 on individuals and sub-populations in their localised setting. This focus will benefit from  
26  
27 supplementing AIHW reporting, based on unlinked data, with administrative records linked  
28  
29 to individuals and their use of services. The latter are becoming more routinely available in  
30  
31 Australian states and territories. Using these in quantifying disproportionate hospitalisation,  
32  
33 re-hospitalisation and time spent in hospital while simultaneously describing the system  
34  
35 resources involved can provide valuable information on which elements of the health system  
36  
37 are working, for whom and in what context<sup>2,54</sup>.  
38  
39

40  
41  
42  
43 This study considers the disparity between rates of PPH for chronic conditions for Aboriginal  
44  
45 and non-Aboriginal South Australians. It examines the association between area level  
46  
47 socioeconomic disadvantage, geographic remoteness and the frequency, length, and cost of  
48  
49 hospitalisation for chronic PPH within those populations. This paper addresses three  
50  
51 questions. Which individuals experienced chronic PPH? How does the length of stay and cost  
52  
53 of hospitalisation for these conditions vary between Aboriginal and non-Aboriginal  
54  
55  
56  
57  
58  
59  
60

1  
2  
3 populations? What is the relationship between the ecological risk factors of area level socio-  
4  
5 economic position and remoteness with PPH for chronic diseases within these populations?  
6  
7  
8  
9

## 10 **Methods**

### 11 *Ethics approval*

12  
13  
14 Research ethics committee approvals are held from SA Health (467/08/2014) and the  
15  
16 Aboriginal Health Council of South Australia (04-11-406).  
17  
18  
19

### 20 *Study design*

21  
22 A period prevalence study using linked, public hospital administrative records.  
23  
24  
25  
26

### 27 *Data sources*

#### 28 **Hospital separations**

29  
30  
31  
32 Details of the universally available healthcare for patients admitted to public hospitals are  
33  
34 collated at time of their discharge, or separation, from hospital then added to the Integrated  
35  
36 South Australian Activity Collection (ISAAC) maintained by SA Health, the state  
37  
38 government's lead health agency. The term 'separations' is used synonymously with  
39  
40 'admissions'<sup>14 51 55 56</sup> and 'hospitalisations',<sup>12 18 25 30 40 45 48 52</sup> reported in other research  
41  
42 referenced by our study. Chronic PPH within ISAAC records for financial years 2005-06 to  
43  
44 2010-11 were categorised using AIHW criteria for ICD-10 primary diagnoses and relevant  
45  
46 procedure codes<sup>57</sup>. ISAAC includes mandatory fields of age, Aboriginal identification and  
47  
48 Statistical Local Area (SLA) of usual residence. Residents of the Anangu Pitjantjatjara  
49  
50 Yankunytjatjara Lands (APY Lands) access over 95% of their hospital services in the  
51  
52 neighbouring jurisdiction (at Alice Springs Hospital in the Northern Territory)<sup>58</sup>. This activity  
53  
54  
55  
56  
57  
58  
59  
60

1  
2  
3 is not recorded within ISAAC so any residual APY resident hospitalisations were removed  
4  
5 from hospital and population denominator counts.  
6

7  
8 Hospital costs across the period were calculated in a uniform manner using Australia's  
9  
10 National Efficient Price for public hospital health care activity in 2015-16<sup>7</sup> and expressed in  
11  
12 Australian dollars. These prices are based on each separation's Australian Refined Diagnostic  
13  
14 Related Group (AR-DRGv7.0) with loadings for outlying LOS, Aboriginality (4%) and area  
15  
16 remoteness (ranging from an additional 8% in outer regional to 22% for very remote areas).  
17

### 18 19 **Hospital separations for individuals**

20  
21 Analysis of separations for individual people was facilitated by probabilistically linked  
22  
23 project keys from SA-NT DataLink, an organisation within Australia's data linkage network.  
24  
25 These keys enabled grouping of each person's separations across hospitals and time. Each  
26  
27 individual's records were assigned the last recorded age and the SLA recorded in that  
28  
29 person's index, or first occurring, separation. Aboriginality was categorised on the basis of a  
30  
31 person having identified as Aboriginal in *any* hospital separation during the observation  
32  
33 period. Identification of Aboriginal status can be difficult and introduce misclassification bias  
34  
35 <sup>59</sup>. Accordingly, a more stringent definition for sensitivity analyses was based on a person  
36  
37 identifying as Aboriginal on more than 75% of records.  
38  
39  
40  
41

### 42 43 **Population and Statistical Geography**

44  
45 South Australia is in southern, central Australia. Comprising a land area of almost one  
46  
47 million square kilometres and a resident population of 1.64 million<sup>60</sup>, 71% in the capital's  
48  
49 metropolitan area, SA has a low population density of 1.67 persons per square kilometre. The  
50  
51 Aboriginal population comprised 2.3% of population with one half residing in the  
52  
53 metropolitan area<sup>60</sup>.  
54  
55  
56  
57  
58  
59  
60

1  
2  
3 The study's population denominators were based on Australia's Census years in 2006 and  
4 2011<sup>61</sup>. The relevant estimates of resident population by sex, age and Aboriginality include  
5 sex and age profiles by rurality and total population for SLAs, the smallest routinely available  
6 geographic areas for intrastate analysis<sup>62</sup>. The mean annual total population for each SLA was  
7 12,584 (SD=10,029) ranging from 0 to 36,407<sup>63</sup>.

8  
9  
10  
11  
12  
13  
14 The Australian Bureau of Statistics (ABS) index SLAs by socio-economic characteristics<sup>64</sup>  
15 and geographic remoteness. Census 2011 Index of Relative Socio-economic Disadvantage  
16 (IRSD)<sup>57 64 65</sup> ranks SLAs whereby 1 is least disadvantaged and 123 the most disadvantaged  
17 area. These are further aggregated to disadvantage quintiles of approximately equal  
18 population size<sup>62</sup>. SLAs with nominal population and no relative IRSD rank would not  
19 contribute to the analysis and were omitted. The Accessibility/Remoteness Index of Australia  
20 (ARIA+) uses road distance to service centres<sup>62</sup> to allocate a continuous measure ranging  
21 from 0 (high accessibility) to 15 (high remoteness). SLAs can be collapsed into categories of  
22 major city (ARIA+  $\leq 0.2$ ), regional (ARIA+  $> 0.2$  &  $\leq 5.92$ ) and remote areas (ARIA+  $>$   
23 5.92).

### 24 25 26 27 28 29 30 31 32 33 34 35 36 37 38 *Data analysis*

39  
40 Crude, unadjusted rates of individuals experiencing chronic PPH with respect to  
41 Aboriginality, sex, age and area level IRSD quintiles and remoteness categories were  
42 summarised using cross-tabulations. Among these individual patients, the mean number of  
43 chronic PPH separations experienced is initially described. The mean, totalled LOS and  
44 hospital costs associated with those separations is then added.

45  
46  
47  
48  
49  
50  
51  
52  
53  
54  
55  
56  
57  
58  
59  
60  
60 LOS and cost outcomes were then placed into a broader, population context. Indirect sex and  
age adjustment<sup>66</sup> with five year age groupings to 75+<sup>67</sup> controlled for confounding from sex  
and age variations between Aboriginal and non-Aboriginal people experiencing chronic PPH

1  
2  
3 and the population more generally. Area outcomes therefore represent the ratio of observed  
4  
5 versus expected outcome based on South Australian totals. For example, an outcome of 1.50  
6  
7 for total chronic PPH LOS among a population group indicates the ratio of observed versus  
8  
9 expected LOS across that group was one and a half times, or 50% higher, than the South  
10  
11 Australian average after adjusting for sex and age differences.  
12

13  
14 Outcomes of LOS and hospital cost ratios observed among the population of each SLA were  
15  
16 positively skewed and subsequently normalised using square root transformations. The  
17  
18 relationship between transformed outcomes and the potential covariates of SLA IRSD rank  
19  
20 and remoteness were examined using least squares regressions<sup>68</sup> with each SLA's  
21  
22 contribution weighted by population size. While the focus was on chronic PPH as a group,  
23  
24 diabetes complications are known to be nationally over represented among Aboriginal  
25  
26 people<sup>69</sup> as the largest single chronic PPH condition and up to 10 times the rate of the non-  
27  
28 Aboriginal population. To examine any potential bias introduced by an association between  
29  
30 diabetes complications, area disadvantage and remoteness, records were further stratified as  
31  
32 either diabetes complications or all other chronic PPH with analyses repeated for each. The  
33  
34 reported coefficients and 95% confidence intervals represent the change in the standardised  
35  
36 ratio for each one unit change in disadvantage rank and remoteness.  
37  
38  
39  
40  
41

42 All analyses used Stata version 14.2<sup>70</sup>.  
43  
44  
45  
46

## 47 **Results**

### 48 *Crude Separations*

49  
50  
51  
52 Of 1,828,846 public hospital separations involving usual SA residents, 117,127 (6.4%) were  
53  
54 categorised as chronic PPH. Aboriginal people experienced these at 2.2 (95%CI 2.1-2.4)  
55  
56  
57  
58  
59  
60

1  
2  
3 times the rate of non-Aboriginals (N=4,391 at 26.7 chronic PPH per 1,000 persons per year  
4  
5 compared to N=112,736 at 12.1 per 1,000 persons per year).  
6  
7

8 *Demographic and diagnostic profile (Person-based analysis)*  
9

10  
11 Chronic PPH involved 60,208 individuals 1,892, or 3.2%, of whom were Aboriginal. Table 1  
12  
13 quantifies aspects of their experience showing Aboriginal people were 1.8 (95%CI 1.6-2.1)  
14  
15 times more likely to be hospitalised than non-Aboriginal people. There were several marked  
16  
17 differences in conditions responsible for hospitalisation with diabetes complications being the  
18  
19 primary diagnosis for more than one-third of Aboriginal patients with chronic PPH compared  
20  
21 to around one in five non-Aboriginal patients. Chronic PPH events can involve more than one  
22  
23 diagnosed chronic condition and this was observed more frequently among Aboriginal  
24  
25 patients. For instance, the 2,311 diagnosed chronic conditions among 1,892 Aboriginal  
26  
27 patients hospitalised averages 1.22 per patient. The comparison for non-Aboriginal patients  
28  
29 was 1.14 comprising 66,343 chronic condition diagnoses among 58,316 patients.  
30  
31  
32

33  
34 Aboriginal patients experiencing chronic PPH were more likely to be female and of a much  
35  
36 younger age compared to non-Aboriginal patients (median ages of 48 and 70 years  
37  
38 respectively). The proportion of individual Aboriginal patients from areas of most  
39  
40 disadvantage (54.1% versus 26.7%) or regional and remote areas (64.2% versus 35.6%) was  
41  
42 around double that of non-Aboriginal people.  
43  
44

45  
46 The number of chronic PPH, associated LOS and estimated hospital costs averaged across  
47  
48 individual patients are summarised in Table 2. The dominant pattern is one of more frequent  
49  
50 hospitalisation per Aboriginal person by sex, and across areas of residence and most age  
51  
52 groupings. The average of 11.7 days LOS was 30% greater for Aboriginal patients with the  
53  
54 differences peaking in the 55-74 age ranges. Hospital costs follow a similar pattern but with  
55  
56 more pronounced differences by Aboriginality. For example, averaged hospital costs  
57  
58  
59  
60



1  
2  
3 accumulated for Aboriginal patients were 56% higher than non-Aboriginal patients (\$17,928  
4 versus \$11,515) with differences were most prominent in the 55-74 age ranges. The absolute  
5 difference in excess of \$11,500 represented an almost two-fold difference in relative terms.  
6  
7

8  
9  
10 Figure 1A illustrates the stark disparity in the age at which Aboriginal and non-Aboriginal  
11 people experienced a first chronic PPH. Figure 1B then illustrates the mean number of  
12 separations those individual patients experienced. Aboriginal people aged 35-44 or more not  
13 only experienced markedly higher rates of chronic PPH but having had a first event, they  
14 were increasingly likely to experience at least one more event.  
15  
16  
17  
18  
19

### 20 21 22 *Sex and age standardised LOS and costs*

23  
24 Figure 2 places results for individuals hospitalised into a population context by graphing sex  
25 and age standardised outcomes by Aboriginality (LOS in Figure 2A and costs in Figure 2B)  
26 for all areas, then disadvantage quintiles and remoteness categories. Each marker is weighted  
27 by area population as per Supplemental Online Table B. Figure 2A illustrates the LOS rate  
28 associated with chronic PPH within the Aboriginal population was six times more than the  
29 state average after adjusting for sex and age. Chronic PPH LOS among Aboriginal and non-  
30 Aboriginal populations progressively increased across levels of area disadvantage but change  
31 was far more pronounced within the Aboriginal population and concentrated among the  
32 relatively larger disadvantaged populations in Quintiles 4 and 5. Similarly, comparison of  
33 major city with remote locations involved nearly threefold higher results from 4.2 to 12.1  
34 times the state average. Hospital costs incurred (Figure 2B) show very similar patterns with  
35 slightly higher mean differences between Aboriginal and non-Aboriginal results.  
36  
37  
38  
39  
40  
41  
42  
43  
44  
45  
46  
47  
48  
49  
50

51  
52 Linear regression models between the two sex and age standardised outcomes of LOS and  
53 cost ratios across three levels (all chronic PPH; diabetes complications; all other chronic  
54 PPH) and the covariates of area level disadvantage and remoteness are presented for  
55  
56  
57  
58  
59  
60

1  
2  
3 Aboriginal and non-Aboriginal populations in Table 3. After allowing for sex and age  
4 differences, Aboriginal people's LOS and cost outcomes, for each level, varied significantly  
5 across area disadvantage and remoteness. For example, within the Aboriginal population the  
6 standardised LOS rate ratio associated with all chronic PPH was 2.09 (95%CI 0.00-5.83)  
7 times the state average (of one). The disparate LOS rate increased by an average of 0.03  
8 (95% CI 0.00-0.07) with each change in disadvantage rank and a further 1.04 (95%CI 0.63-  
9 1.44) as remoteness increased. These associations of disadvantage and remoteness with LOS  
10 were consistent within stratified subgroups of diabetes complications and all other chronic  
11 PPH. However, the magnitude of change in LOS ratios was higher for diabetes complications  
12 (2.59; 95%CI 0.00-10.82) than for all other chronic PPH (1.86; 95%CI 0.43-1.21) before  
13 adjusting for the influence of area disadvantage and remoteness. The change observed in LOS  
14 for diabetes complications was around twice that for all other chronic PPH for both  
15 disadvantage (0.05; 95%CI 0.00-0.15 versus 0.02; 95%CI 0.00-0.06) and remoteness (1.62;  
16 95%CI 0.73-2.51 versus 0.82; 95%CI 0.43-1.21). Similar variations in standardised cost ratio  
17 outcomes across levels of outcome and by disadvantage and remoteness were observed for  
18 the Aboriginal population.

19  
20  
21 Results for the non-Aboriginal population also show consistent associations between area  
22 disadvantage and each outcome and level whereby the standardised ratio increased as  
23 disadvantage increased. However, area remoteness was not associated with increased LOS or  
24 cost. Moreover, the base from which change occurred was substantially lower. For instance,  
25 the standardised LOS ratio for chronic PPH among the non-Aboriginal population before  
26 adjusting for disadvantage rank was less than half (95%CI 38%-54%) of the state average.

27  
28  
29 The potential for interaction between area disadvantage and remoteness was examined  
30 without result. Sensitivity analyses using a more stringent definition of Aboriginality were  
31 also conducted but did not change our overall conclusions<sup>71</sup>.

## Discussion

This study provides evidence of stark disparities in the rates with which Aboriginal and non-Aboriginal individuals experienced potentially preventable hospitalisation for chronic conditions. Aboriginal people had almost twice the risk of experiencing a chronic PPH overall compared to their non-Aboriginal contemporaries. Other disparities noted include higher chronic PPH rates among Aboriginal females and younger adults with rates steeply increasing from least to most disadvantaged quintiles and/or remote areas of South Australia. Conversely, non-Aboriginal patients were more likely to be concentrated among older adults. A social gradient across disadvantage levels was also apparent however the steepness of the gradient from most to least disadvantaged areas was markedly lower for non-Aboriginal people. These findings are consistent with the wider literature focused on ethnic differences in PPH<sup>35-37</sup> and underpin the disproportionate population rates of chronic PPH among Aboriginal South Australians<sup>9 57 69</sup>.

This analysis at the individual level furthers our understanding by demonstrating how, having experienced one chronic PPH event, Aboriginal patients were also more likely to endure further chronic PPH. This was associated with an increased accrual of time spent in hospital which was almost one-third higher for Aboriginal patients. Moreover, the associated hospital costs were more than 50% higher than for non-Aboriginal patients on average and more variable within the group of Aboriginal patients.

Sex and age adjusted rates of time spent in hospital for chronic PPH and expressed as rates per capita reflect the number of individuals and the length of time hospitalised. These standardised population outcomes showed LOS for chronic PPH among Aboriginal South Australians was six times higher than the state average. The best outcomes within the

1  
2  
3 Aboriginal community were observed among the relatively few living in areas of least  
4 disadvantage, albeit these were still markedly higher than the state average. Diabetes  
5 complications are heavily implicated in chronic PPH for Aboriginal people. Their presence,  
6  
7 with or without other chronic conditions, exacerbate LOS rates and hospital costs among  
8  
9 Aboriginal people but not so within the non-Aboriginal population. Even after partitioning  
10  
11 out diabetes related hospitalisations, substantial differences in LOS and cost remain among  
12  
13 other chronic PPH experienced by Aboriginal people.  
14  
15  
16  
17  
18  
19  
20  
21

22 The results further highlight systematic inequities between populations while also  
23 highlighting substantial within-population variation whereby a relatively small number of  
24 people experienced considerable time in hospital and away from their usual societal roles  
25 because of chronic health conditions. This is consistent with recent US literature  
26 demonstrating the role of chronic PPH, and particularly diabetes, as sustaining and even  
27 increasing disparities between African Americans and whites<sup>56</sup>. Similarly, it affirms other  
28 Australian research highlighting widespread Aboriginal/non-Aboriginal differences and  
29 differences within the Aboriginal population in chronic PPH generally and the pervasive,  
30 adverse results of diabetes complications across geographic areas<sup>48</sup>. Moreover, the results  
31 identified that increased chronic PPH were accompanied by systematically increased accrual  
32 of LOS and greater hospital costs.  
33  
34  
35  
36  
37  
38  
39  
40  
41  
42  
43  
44  
45  
46

47 The extent to which these differences are amenable to change needs further discussion. By  
48 definition, chronic PPH represent opportunities for change through exposure to primary  
49 health care, notwithstanding a range of individual, societal, clinical and system level factors  
50 are related to their occurrence<sup>72 73</sup> and may each be associated with realising this potential.  
51  
52 This is supported by studies of risk factor exposure across levels of socio-economic  
53  
54  
55  
56  
57  
58  
59  
60

1  
2  
3 disadvantage and remoteness<sup>33</sup>. Whether the chronic PPH events were preventable in their  
4  
5 immediate context is less certain. The high prevalence of diabetes complications and higher  
6  
7 levels of chronic multi-morbidities among Aboriginal patients observed in this study suggests  
8  
9 comparatively more advanced disease for which hospitalisations, more often, for longer  
10  
11 periods and at greater cost is an appropriate and expected result. A heightened need for  
12  
13 preventive and early intervention through primary and community care is evident.  
14  
15

16  
17 Authoritative reviews of the international literature found chronic PPH<sup>74 75</sup>, and unplanned  
18  
19 hospitalisation more generally<sup>76</sup> among selected patient groups, were reduced by  
20  
21 interventions promoting self-management support, continuity of care with a general  
22  
23 practitioner, and integration of primary and secondary care. Other interventions, such as case  
24  
25 management, appear to reduce LOS<sup>74-76</sup>. However, each review was restricted by a relative  
26  
27 lack of robust evaluation of interventions as they are introduced into health systems. Such  
28  
29 evaluations are emerging and indicate promising primary healthcare interventions in chronic  
30  
31 disease management and diabetes are available. Australia's largest randomised intervention  
32  
33 in diabetes delivered positive outcomes in HbA1c levels, blood pressure, waist  
34  
35 circumference, depression, care-plan take-up and chronic PPH in the trial group receiving  
36  
37 each of five available quality improvement and flexible funding components<sup>43</sup>. Mainstream  
38  
39 general practice services are less available for remote Aboriginal populations exhibiting  
40  
41 greater need in terms of chronic PPH LOS and costs yet evidence of effective intervention  
42  
43 among Aboriginal populations is available<sup>77</sup>. Randomised diabetes care led by community  
44  
45 health workers in regional and remote areas showed promising HbA1c reductions among  
46  
47 poorly controlled type 2 diabetes patients<sup>78</sup> and modest net reductions in diabetes related  
48  
49 hospitalisation in the treatment group<sup>79</sup>. Nevertheless, a critical need for substantively  
50  
51 increasing the training and supply of Aboriginal health care workers remains<sup>80</sup>. Generally  
52  
53  
54  
55  
56  
57  
58  
59  
60

1  
2  
3 negative evaluation of incremental cost-effectiveness assessments based on short-term,  
4  
5 averaged and disease specific results<sup>43 79</sup> may impede this investment.  
6  
7

8 Our description of who is more likely to experience chronic PPH, for what conditions, with  
9  
10 what frequency and at what direct cost to the health system suggest three areas for developing  
11  
12 incremental cost to outcome analyses. The first is to consider flow-on benefits from disease-  
13  
14 specific interventions to other comorbid chronic conditions, especially where disparities in  
15  
16 condition prevalence exist. Second, evaluation based on longer term accumulated  
17  
18 hospitalisation costs for individual trial participants is warranted. Where project term  
19  
20 constraints apply, our results provide an initial empiric base. Finally, placing individual  
21  
22 participant results into a population context provides an information base for allocating  
23  
24 resources which address health care needs for primary and community care at lower cost to  
25  
26 individuals and acute care services<sup>24</sup>.  
27  
28  
29

30  
31 Subsequent reporting of cumulative LOS and costs at a person level adds value to system  
32  
33 performance monitoring by making the person and patient the centre of reporting and  
34  
35 evaluation, as well as the centre of care. Providing empirical evidence of change occurring at  
36  
37 individual and population levels will help align system activities and monitoring with the  
38  
39 ultimate aim of providing appropriate and effective care of patients and people, equitably and  
40  
41 efficiently.  
42  
43

#### 44 45 *Limitations*

46  
47 The study has several limitations. First, cumulative LOS as an outcome variable is influenced  
48  
49 by the nature of admission with inter-hospital transfers having longer LOS than emergency  
50  
51 admissions<sup>6</sup>. Recurrent hospital events for chronic conditions among people in regional and  
52  
53 remote settings may involve comparatively more inter-hospital transfers or planned  
54  
55 admissions for treatment where primary health interventions are scarce. Nevertheless, the  
56  
57  
58  
59  
60

1  
2  
3 observations summarised in this study represent an aspect of peoples' lived experience of  
4  
5 contending with chronic disease. Continuing research will benefit from focussing on mode of  
6  
7 admission to hospital and the local availability of primary care. Second, the propensity to  
8  
9 identify as Aboriginal has increased across recent times and any undercounting in earlier  
10  
11 Aboriginal population denominators would affect population rates. However, this study's  
12  
13 population estimates are drawn from the internally consistent ABS series covering 1996 to  
14  
15 2011 as based on the 2011 Census and the first available set of ABS non-experimental  
16  
17 population denominators. Accordingly, there are no known inflation of rates due to  
18  
19 population undercounts. Nevertheless, estimates incorporating Census 2016 will provide a  
20  
21 valuable reliability check when used with concurrent hospital data in future analyses. Third,  
22  
23 while public hospital care is universally available in SA and estimating rates makes  
24  
25 appropriate use of population denominators, the omission of private hospital separations  
26  
27 undercounts some chronic PPH, particularly among relatively advantaged citizens. Further  
28  
29 studies will benefit from including these private hospital separations and from exploring  
30  
31 whether chronic PPH were associated with planned care or the result of emergency  
32  
33 presentations. Finally, the omission of the APY Lands SLA means chronic PPH outcomes  
34  
35 associated with a very remote area and SA's most disadvantaged are not represented<sup>81</sup>.  
36  
37 Subsequent research in the area will benefit from including APY Land residents hospitalised  
38  
39 in the Northern Territory<sup>50</sup> to ensure results for the most remote and disadvantaged  
40  
41 population groups are not underestimated.  
42  
43  
44  
45  
46  
47  
48  
49  
50

## 51 **Conclusion**

52  
53 The results show heightened risk of chronic PPH among Aboriginal individuals which  
54  
55 compounds into more re-hospitalisation and accumulated time in hospital at greater cost to  
56  
57  
58  
59  
60

1  
2  
3 the person, their community and the health system. At a population level, the systematic  
4  
5 change in chronic PPH and LOS by Aboriginality and area suggests efforts to address these  
6  
7 potentially avoidable hospitalisations will benefit from targeting specific population  
8  
9 segments, particularly in areas of greater socio-economic disadvantage and geographic  
10  
11 remoteness. This analysis helps guide such actions by identifying sub-populations within the  
12  
13 wider community who could most benefit from improved understanding of antecedent causes  
14  
15 of hospitalisation. Routine, reporting across population groups and regions will help monitor  
16  
17 progress in meeting the underlying population health needs with earlier, and perhaps lower  
18  
19 cost, interventions.  
20  
21  
22  
23  
24  
25  
26

## 27 **Abbreviations**

28  
29 ABS: Australian Bureau of Statistics

30  
31 AIHW: Australian Institute of Health and Welfare;

32  
33 APY Lands: Anangu Pitjantjatjara Yankunytjatjara Lands;

34  
35 ISAAC: Integrated South Australian Activity Collection;

36  
37 LOS: Length of stay;

38  
39 PPH: Potentially preventable hospitalisation;

40  
41 SA: South Australia;

42  
43 SLA: Statistical Local Areas;  
44  
45  
46  
47  
48  
49

## 50 **Author contributions**

51  
52 DB conceived the project, performed the analyses and drafted the manuscript; TC contributed  
53  
54 to literature searching and manuscript preparation; JK, AB and JL made important  
55  
56  
57  
58  
59  
60



1  
2  
3 contributions to operationalising this study, interpreting the statistical analysis, and revised  
4  
5 the manuscript. All authors read and approved the final version of the manuscript.  
6  
7

## 8 **Acknowledgements**

9  
10 DB is supported in part by an Australian Government Research Training Program  
11  
12 Scholarship. AB is supported by The Sylvia and Charles Viertel Senior Medical Research  
13  
14 Fellowship. The authors thank: SAHMRI & the Wardliparingga Aboriginal Health Research  
15  
16 Unit for providing a Summer Scholarship for TC; and, SA Health for administrative unit  
17  
18 records via Statistical Linkage Project 2010-0004. John Glover, Torrens University's Public  
19  
20 Health Information Development Unit (PHIDU) and the Australian Department of Health for  
21  
22 Aboriginal and Torres Strait Islander small area population estimates for 2006.  
23  
24  
25  
26  
27

28  
29 The authors declare they have no competing interests.  
30  
31  
32  
33

## 34 **Funding Statement**

35  
36 There is no funding to report for this submission.  
37  
38  
39  
40  
41

## 42 **Data Sharing Statement**

43  
44 The study's data comprised of de-identified unit record administrative records. These were  
45  
46 used under privileged arrangements set out in a study specific confidentiality deed. The data  
47  
48 cannot be accessed by another party without relevant departmental and human research ethics  
49  
50 approvals.  
51  
52  
53  
54  
55  
56  
57  
58  
59  
60

## References

1. Vos T, Flaxman AD, Naghavi M, et al. Years lived with disability (YLDs) for 1160 sequelae of 289 diseases and injuries 1990–2010: a systematic analysis for the Global Burden of Disease Study 2010. *The Lancet* 2012;380(9859):2163-96. doi: [http://dx.doi.org/10.1016/S0140-6736\(12\)61729-2](http://dx.doi.org/10.1016/S0140-6736(12)61729-2)
2. Alliance for Health Policy and System Research. Systems Thinking for Health Systems Strengthening. Geneva: World Health Organization, 2009.
3. Victorian Auditor-General's Report. Hospital Performance: Length of Stay. Melbourne: Victorian Government, 2016.
4. Australian Institute of Health and Welfare. Health expenditure Australia 2013–14: analysis by sector. Canberra: AIHW, 2015.
5. Australian Institute of Health and Welfare. Health expenditure Australia 2013–14. Canberra: AIHW, 2015.
6. Kulinskaya E, Kornbrot D, Gao H. Length of stay as a performance indicator: robust statistical methodology. *IMA Journal of Management Mathematics* 2005;16(4):369-81.
7. Independent Hospital Pricing Authority. National Efficient Price Determination: 2015-16: IHPA, 2015.
8. National Health Performance Authority. Hospital Performance: Length of stay in public hospitals in 2011–12. Sydney: NHPA, 2013.
9. Australian Institute of Health and Welfare. Australian hospital statistics 2012–13. Canberra: AIHW, 2014.
10. Australian Institute of Health and Welfare. National Healthcare Agreement: PI 18-Selected potentially preventable hospitalisations, 2013. 2013
11. National Health Performance Authority. National Health Reform: Performance and Accountability Framework: National Health Performance Authority, 2013.
12. Katterl R, Anikeeva O, Butler C, et al. Potentially avoidable hospitalisations in Australia: Causes for hospitalisations and primary health care interventions. 2012
13. Jackson G, Tobias M. Potentially avoidable hospitalisations in New Zealand, 1989-98. *Australian and New Zealand Journal of Public Health* 2001;25(3):212.
14. Longman J, Passey M, Ewald D, et al. Admissions for chronic ambulatory care sensitive conditions - a useful measure of potentially preventable admission? *BMC Health Services Research* 2015;15(1):472.
15. Agency for Healthcare Research and Quality. Quality Indicator User Guide: Prevention Quality Indicators (PQI) Composite Measures Version 4.4. Rockville: US Department of Health and Human Services, 2012.
16. Rosano A, Loha CA, Falvo R, et al. The relationship between avoidable hospitalization and accessibility to primary care: a systematic review. *The European Journal of Public Health* 2013;23(3):356-60. doi: 10.1093/eurpub/cks053
17. Niti M, Ng TP. Avoidable hospitalisation rates in Singapore, 1991-1998: Assessing trends and inequities of quality in primary care. *Journal of Epidemiology and Community Health* 2003;57(1):17-22.
18. Ansari Z, Haider SI, Ansari H, et al. Patient characteristics associated with hospitalisations for ambulatory care sensitive conditions in Victoria, Australia. *BMC Health Services Research* 2012;12(1)
19. Billings J, Zeitel L, Lukomnik J, et al. Impact of socioeconomic status on hospital use in New York City. *Health Affairs* 1993;12(1):162-73.
20. Swerissen H, Duckett S, Wright J. Chronic failure in primary medical care: Grattan Institute, 2016.
21. Culyer AJ. Efficiency, equity and equality in health and health care: Centre for Health Economics, University of York, 2016.

- 1
- 2
- 3 22. Muenchberger H, Kendall E. Determinants of avoidable hospitalization in chronic disease:  
4 Development of a predictor matrix. *Meadowbrook: Griffith University* 2008
- 5 23. McIntyre D, Mooney G, editors. *The Economics of Health Equity* Cambridge: Cambridge  
6 University Press, 2007.
- 7 24. Diderichsen F. Resource allocation for Health Equity: Issues and methods. Washington DC: The  
8 World Bank, 2004.
- 9 25. Laditka J, Laditka S. Race, ethnicity and hospitalization for six chronic ambulatory care sensitive  
10 conditions in the USA. *Ethnicity and Health* 2006;11(3):247-63.
- 11 26. Moy E, Mau MK, Raetzman S, et al. Ethnic differences in potentially preventable hospitalizations  
12 among Asian Americans, Native Hawaiians, and Other Pacific Islanders: Implications for  
13 reducing health care disparities. *Ethnicity and Disease* 2013;23(1):6-11.
- 14 27. Booth GL, Hux JE, Fang J, et al. Time trends and geographic disparities in acute complications of  
15 diabetes in Ontario, Canada. *Diabetes Care* 2005;28(5):1045-50.
- 16 28. Muenchberger H, Kendall E. Predictors of preventable hospitalization in chronic disease:  
17 Priorities for change. *Journal of Public Health Policy* 2010;31(2):150-63.
- 18 29. Trachtenberg AJ, Dik N, Chateau D, et al. Inequities in ambulatory care and the relationship  
19 between socioeconomic status and respiratory hospitalizations: A population-based study of  
20 a Canadian city. *Annals of Family Medicine* 2014;12(5):402-07.
- 21 30. Roos LL, Walld R, Uhanova J, et al. Physician visits, hospitalizations, and socioeconomic status:  
22 ambulatory care sensitive conditions in a Canadian setting. *Health Services Research*  
23 2005;40(4):1167-85.
- 24 31. OECD. Geographic Variations in Health Care: OECD Publishing 2014.
- 25 32. Australian Institute of Health and Welfare. Aboriginal and Torres Strait Islander Health  
26 Performance Framework 2012: detailed analyses. Canberra: AIHW, 2013.
- 27 33. Australian Health Ministers' Advisory Council (AHMAC). Aboriginal and Torres Strait Islander  
28 Health Performance Framework 2014 Report. Canberra: Australian Government,  
29 Department of the Prime Minister and Cabinet, 2015.
- 30 34. Bywood PT, Katterl R, Lunnay BK. Disparities in primary health care utilisation: Who are the  
31 disadvantaged groups? How are they disadvantaged? What interventions work? PHC RIS  
32 Policy Issue Review. Adelaide: Primary Health Care Research & Information Service, 2011.
- 33 35. Korenbrot CC, Ehlers S, Crouch JA. Disparities in hospitalizations of rural American Indians.  
34 *Medical Care* 2003;41(5):626-36.
- 35 36. Shah BR, Gunraj N, Hux JE. Markers of access to and quality of primary care for Aboriginal people  
36 in Ontario, Canada. *American Journal of Public Health* 2003;93(5):798-802.
- 37 37. Barnett R, Malcolm L. Practice and ethnic variations in avoidable hospital admission rates in  
38 Christchurch, New Zealand. *Health & place* 2010;16(2):199-208.
- 39 38. Zhao Y, Connors C, Wright J, et al. Estimating chronic disease prevalence among the remote  
40 Aboriginal population of the Northern Territory using multiple data sources. *Australian and  
41 New Zealand Journal of Public Health* 2008;32(4):307-13. doi: 10.1111/j.1753-  
42 6405.2008.00245.x
- 43 39. Wong CX, Brooks AG, Cheng YH, et al. Atrial fibrillation in Indigenous and non-Indigenous  
44 Australians: A cross-sectional study. *BMJ Open* 2014;4(10) doi: 10.1136/bmjopen-2014-  
45 006242
- 46 40. Teng T-HK, Katzenellenbogen JM, Thompson SC, et al. Incidence of first heart failure  
47 hospitalisation and mortality in Aboriginal and non-Aboriginal patients in Western Australia,  
48 2000–2009. *International Journal of Cardiology* 2014;173(1):110-17. doi:  
49 <http://dx.doi.org/10.1016/j.ijcard.2014.02.020>
- 50 41. He VY, Condon JR, Ralph AP, et al. Long-Term Outcomes From Acute Rheumatic Fever and  
51 Rheumatic Heart Disease: A Data-Linkage and Survival Analysis Approach. *Circulation*  
52 2016;134(3):222-32. doi: 10.1161/CIRCULATIONAHA.115.020966
- 53
- 54
- 55
- 56
- 57
- 58
- 59
- 60

- 1
  - 2
  - 3
  - 4
  - 5
  - 6
  - 7
  - 8
  - 9
  - 10
  - 11
  - 12
  - 13
  - 14
  - 15
  - 16
  - 17
  - 18
  - 19
  - 20
  - 21
  - 22
  - 23
  - 24
  - 25
  - 26
  - 27
  - 28
  - 29
  - 30
  - 31
  - 32
  - 33
  - 34
  - 35
  - 36
  - 37
  - 38
  - 39
  - 40
  - 41
  - 42
  - 43
  - 44
  - 45
  - 46
  - 47
  - 48
  - 49
  - 50
  - 51
  - 52
  - 53
  - 54
  - 55
  - 56
  - 57
  - 58
  - 59
  - 60
42. Gibson OR, Segal L, McDermott RA. A systematic review of evidence on the association between hospitalisation for chronic disease related ambulatory care sensitive conditions and primary health care resourcing. *BMC health services research* 2013;13(1):1-13.
43. Department of Health. Evaluation Report of the Diabetes Care Project. Canberra: Australian Government, 2016.
44. Li SQ, Gray N, Guthridge S, et al. Avoidable hospitalisation in Aboriginal and non-Aboriginal people in the Northern Territory. 2009
45. Ansari MZ, Simmons D, Hart WG, et al. Preventable hospitalisations for diabetic complications in rural and urban Victoria. *Australian Journal of Primary Health - Interchange* 2000;6(3-4):261-73.
46. Anderson M, Dugdale A. Ambulatory services in an aboriginal community and a west Queensland rural area. *The Australian journal of rural health* 1997;5(3):121-25.
47. Department of Health. Annual Performance Management Framework 2014-2015: Activity Based Funding and Management Program. Perth: Department of Health, 2014.
48. Harrold TC, Randall DA, Falster MO, et al. The contribution of geography to disparities in preventable hospitalisations between indigenous and non-indigenous Australians. *PLoS ONE* 2014;9(5)
49. Banham D, Woollacott T, Gray J, et al. Recognising potential for preventing hospitalisation. *Australian Health Review* 2010;34(1):116-22. doi: doi:10.1071/AH09674
50. Government of South Australia. Aboriginal Health Care Plan 2010-2016. Adelaide, SA: Department of Health, Statewide Service Strategy Division, 2010.
51. Busby J, Purdy S, Hollingworth W. A systematic review of the magnitude and cause of geographic variation in unplanned hospital admission rates and length of stay for ambulatory care sensitive conditions. *BMC Health Services Research* 2015;15(1):1-15. doi: 10.1186/s12913-015-0964-3
52. Guo MW, Ahn HJ, Juarez DT, et al. Length of Stay and Deaths in Diabetes-Related Preventable Hospitalizations Among Asian American, Pacific Islander, and White Older Adults on Medicare, Hawai'i, December 2006–December 2010. *Preventing Chronic Disease* 2015;12:E124. doi: 10.5888/pcd12.150092
53. Banham D, Jury H, Woollacott T, et al. Aboriginal premature mortality within South Australia 1999-2006: a cross-sectional analysis of small area results. *BMC Public Health* 2011;11(1):286.
54. Pawson R, Greenhalgh J, Brennan C, et al. Do reviews of healthcare interventions teach us how to improve healthcare systems? *Social Science & Medicine* 2014;114(0):129-37. doi: <http://dx.doi.org/10.1016/j.socscimed.2014.05.032>
55. Busby J, Purdy S, Hollingworth W. Using geographic variation in unplanned ambulatory care sensitive condition admission rates to identify commissioning priorities: an analysis of routine data from England. *Journal of Health Services Research & Policy* 2016 doi: 10.1177/1355819616666397
56. Mukamel DBP, Ladd HMS, Li YP, et al. Have Racial Disparities in Ambulatory Care Sensitive Admissions Abated Over Time? *Medical Care* 2015;53(11):931-39.
57. Australian Institute of Health and Welfare. Admitted patient care: Australian hospital statistics 2013–14. Canberra: AIHW, 2015.
58. Division SAdoHSSS. Aboriginal Health Care Plan 2010 – 2016: South Australia. Dept. of Health. Statewide Service Strategy Division, 2010.
59. Thompson SC, Woods JA, Katzenellenbogen JM. The quality of Indigenous identification in administrative health data in Australia: insights from studies using data linkage. *BMC Medical Informatics and Decision Making* 2012;12(1):133. doi: 10.1186/1472-6947-12-133
60. Australian Bureau of Statistics. 3238.0.55.001 - Estimates of Aboriginal and Torres Strait Islander Australians, June 2011, 2013.

- 1
- 2
- 3 61. Australian Bureau of Statistics. Estimates and Projections, Aboriginal and Torres Strait Islander
- 4     Australians: 2001 to 2026. Canberra: ABS, 2014.
- 5 62. Australian Bureau of Statistics. Statistical Geography Volume 1 - Australian Standard
- 6     Geographical Classification (ASGC). Canberra: ABS, 2006.
- 7 63. Australian Bureau of Statistics. Population Estimates by Age and Sex, Australia by Geographical
- 8     Classification [ASGC 2011]. 31 August, 2012 ed: Australian Bureau of Statistics, 2012.
- 9 64. Australian Bureau of Statistics. An introduction to Socio-Economic Indexes for Areas (SEIFA),
- 10     2006. Information Paper. Canberra: ABS, 2008.
- 11 65. Australian Bureau of Statistics. Socio-Economic Indexes for Areas (SEIFA) - Technical Paper, 2011,
- 12     2013.
- 13 66. Berry J, Harrison J. A guide to statistical methods for injury surveillance. Revised ed. Adelaide:
- 14     AIHW, 2005.
- 15 67. Australian Bureau of Statistics. National Aboriginal and Torres Strait Islander health survey 2004-
- 16     05. Canberra, ACT: Australian Bureau of Statistics, 2006.
- 17 68. Australian Bureau of Statistics. ASGC Remoteness Classification: Purpose and Use. Canberra: ABS,
- 18     2003.
- 19 69. Australian Institute of Health and Welfare. Admitted patient care: Australian hospital statistics
- 20     2014–15. Canberra: AIHW, 2016.
- 21 70. Stata Statistical Software: Release 14.2 [program]. College Station, TX: StataCorp LP, 2015.
- 22 71. Delaney JA, Seeger JD. Sensitivity analysis. In: Velentgas P, Dreyer N, Nourjah P, et al., eds.
- 23     Developing a Protocol for Observational Comparative Effectiveness Research: A User's
- 24     Guide. Rockville, MD: Agency for Healthcare Research and Quality 2013.
- 25 72. Passey M, Longman J, Johnston J, et al. Diagnosing Potentially Preventable Hospitalisations
- 26     (DaPPHne): Protocol for a mixed-methods data-linkage study. *BMJ Open* 2015;5(e009879)
- 27     doi: doi:10.1136/bmjopen-2015-009879
- 28 73. Falster MO, Jorm LR, Douglas KA, et al. Sociodemographic and Health Characteristics, Rather
- 29     Than Primary Care Supply, are Major Drivers of Geographic Variation in Preventable
- 30     Hospitalizations in Australia. *Medical Care* 2015;53(5):436-45.
- 31 74. Purdy S. Avoiding hospital admissions: What does the research evidence say?: The King's Fund,
- 32     2010.
- 33 75. Clinical Epidemiology Health Service Evaluation Unit. Potentially preventable hospitalisations: a
- 34     review of the literature and Australian policies. Melbourne: Melbourne Health, 2009.
- 35 76. Purdy S, Paranjothy S, Huntley A, et al. Interventions to reduce unplanned hospital admission: a
- 36     series of systematic reviews: National Institute of Health Research, 2012.
- 37 77. Gibson OR, Segal L. Limited evidence to assess the impact of primary health care system or
- 38     service level attributes on health outcomes of Indigenous people with type 2 diabetes: a
- 39     systematic review. *BMC Health Services Research* 2015;15:154. doi: 10.1186/s12913-015-
- 40     0803-6
- 41 78. McDermott RA, Schmidt B, Preece C, et al. Community health workers improve diabetes care in
- 42     remote Australian Indigenous communities: results of a pragmatic cluster randomized
- 43     controlled trial. *BMC Health Services Research* 2015;15(1):68. doi: 10.1186/s12913-015-
- 44     0695-5
- 45 79. Segal L, Nguyen H, Schmidt B, et al. Economic evaluation of Indigenous health worker
- 46     management of poorly controlled type 2 diabetes in north Queensland. *Med J Aust*
- 47     2016;204(5):1961e-9.
- 48 80. Brown A, Kritharides L. Overcoming cardiovascular disease in Indigenous Australians. *Med J Aust*
- 49     2017;206(1):10-12.
- 50 81. Australian Bureau of Statistics. Census of Population and Housing: Socio-Economic Indexes for
- 51     Areas (SEIFA), Australia - Data only, 2011, 2013.
- 52
- 53
- 54
- 55
- 56
- 57
- 58
- 59
- 60

1  
2  
3  
4  
5  
6  
7  
8  
9  
10  
11  
12  
13  
14  
15  
16  
17  
18  
19  
20  
21  
22  
23  
24  
25  
26  
27  
28  
29  
30  
31  
32  
33  
34  
35  
36  
37  
38  
39  
40  
41  
42  
43  
44  
45  
46  
47  
48  
49  
50  
51  
52  
53  
54  
55  
56  
57  
58  
59  
60

For peer review only

**Table 1 Demographic and diagnostic distribution of Aboriginal and non-Aboriginal patients experiencing a first chronic PPH in SA public hospitals, 2005-06 to 2010-11**

|                               | Aboriginal |        |                                        | non-Aboriginal |        |                                        |
|-------------------------------|------------|--------|----------------------------------------|----------------|--------|----------------------------------------|
|                               | N          | %      | Patients per 1000 population each year | N              | %      | Patients per 1000 population each year |
| Chronic PPH                   | 1,892      | 100.0% | 11.5                                   | 58,316         | 100.0% | 6.2                                    |
| Conditions <sup>^</sup>       |            |        |                                        |                |        |                                        |
| Angina                        | 293        | 15.5%  | 1.8                                    | 10,587         | 18.2%  | 1.1                                    |
| Asthma                        | 528        | 27.9%  | 3.2                                    | 12,346         | 21.2%  | 1.3                                    |
| COPD                          | 341        | 18.0%  | 2.1                                    | 11,930         | 20.5%  | 1.3                                    |
| Congestive cardiac failure    | 221        | 11.7%  | 1.4                                    | 11,079         | 19.0%  | 1.2                                    |
| Diabetes complications        | 700        | 37.0%  | 4.3                                    | 12,574         | 21.6%  | 1.3                                    |
| Hypertension                  | 79         | 4.2%   | 0.5                                    | 2,199          | 3.8%   | 0.2                                    |
| Iron Deficiency Anaemia       | 107        | 5.7%   | 0.7                                    | 4,974          | 8.5%   | 0.5                                    |
| Nutritional deficiencies      | 0          | 0.0%   | 0.0                                    | 62             | 0.1%   | 0.0                                    |
| Rheumatic heart disease       | 42         | 2.2%   | 0.3                                    | 592            | 1.0%   | 0.1                                    |
| Gender                        |            |        |                                        |                |        |                                        |
| Male                          | 860        | 45.5%  | 10.6                                   | 29,970         | 51.4%  | 6.5                                    |
| Female                        | 1,032      | 54.5%  | 12.4                                   | 28,346         | 48.6%  | 6.0                                    |
| Age                           |            |        |                                        |                |        |                                        |
| 0-4                           | 167        | 8.8%   | 8.6                                    | 4,148          | 7.1%   | 8.1                                    |
| 5-14                          | 137        | 7.2%   | 3.5                                    | 3,775          | 6.5%   | 3.4                                    |
| 15-24                         | 92         | 4.9%   | 2.7                                    | 1,691          | 2.9%   | 1.4                                    |
| 25-34                         | 115        | 6.1%   | 5.0                                    | 1,531          | 2.6%   | 1.3                                    |
| 35-44                         | 264        | 14.0%  | 13.1                                   | 2,452          | 4.2%   | 1.9                                    |
| 45-54                         | 429        | 22.7%  | 28.8                                   | 4,211          | 7.2%   | 3.2                                    |
| 55-64                         | 355        | 18.8%  | 44.2                                   | 6,714          | 11.5%  | 5.8                                    |
| 65-74                         | 223        | 11.8%  | 61.0                                   | 9,583          | 16.4%  | 12.7                                   |
| 75+                           | 110        | 5.8%   | 59.7                                   | 24,211         | 41.5%  | 32.8                                   |
| Area Disadvantage (2011 IRSD) |            |        |                                        |                |        |                                        |
| Q1 Least Disadvantage         | 31         | 1.6%   | 3.7                                    | 6,298          | 10.8%  | 3.4                                    |
| Q2                            | 128        | 6.8%   | 7.7                                    | 10,799         | 18.5%  | 5.1                                    |
| Q3                            | 159        | 8.4%   | 7.6                                    | 10,918         | 18.7%  | 6.6                                    |
| Q4                            | 551        | 29.1%  | 11.6                                   | 17,739         | 30.4%  | 7.4                                    |
| Q5 Most Disadvantage          | 1,023      | 54.1%  | 14.5                                   | 15,562         | 26.7%  | 8.9                                    |
| Area Remoteness (ARIA+)       |            |        |                                        |                |        |                                        |
| Major cities                  | 677        | 35.8%  | 8.0                                    | 37,532         | 64.4%  | 5.6                                    |
| Regional                      | 813        | 43.0%  | 13.7                                   | 18,329         | 31.4%  | 7.7                                    |
| Remote                        | 402        | 21.2%  | 19.4                                   | 2,455          | 4.2%   | 7.7                                    |

<sup>^</sup>Subtotals of N=2,311 and 66,343 respectively. Does not round to 100% as chronic PPH can include more than one condition

**Table 2 Mean number of separations, total LOS and hospital cost associated with chronic PPH in South Australian public hospitals, 2005-06 to 2010-11**

|                               | Number of chronic PPH |         |                |         | LOS for chronic PPH |           |                |           | Costs of chronic PPH |                   |                |                   |
|-------------------------------|-----------------------|---------|----------------|---------|---------------------|-----------|----------------|-----------|----------------------|-------------------|----------------|-------------------|
|                               | Aboriginal            |         | non-Aboriginal |         | Aboriginal          |           | non-Aboriginal |           | Aboriginal           |                   | non-Aboriginal |                   |
|                               | Mean                  | 95% CIs | Mean           | 95% CIs | Mean                | 95% CIs   | Mean           | 95% CIs   | Mean                 | 95% CIs           | Mean           | 95% CIs           |
| Chronic PPH                   | 2.6                   | 2.4-2.8 | 1.9            | 1.9-1.9 | 11.7                | 10.6-12.7 | 9.0            | 8.9-9.2   | \$ 17,928            | \$16,367-\$19,490 | \$ 11,515      | \$11,344-\$11,686 |
| Conditions                    |                       |         |                |         |                     |           |                |           |                      |                   |                |                   |
| Diabetes complications        | 2.4                   | 2.1-2.6 | 1.8            | 1.8-1.9 | 13.3                | 11.7-15.0 | 10.0           | 9.7-10.3  | \$ 20,665            | \$18,253-\$23,077 | \$ 14,601      | \$14,172-\$15,031 |
| Other than diabetes           | 2.4                   | 2.2-2.6 | 1.8            | 1.8-1.9 | 9.2                 | 8.1-10.3  | 8.3            | 8.1-8.4   | \$ 14,074            | \$12,416-\$15,733 | \$ 10,083      | \$9,916-\$10,250  |
| Gender                        |                       |         |                |         |                     |           |                |           |                      |                   |                |                   |
| Male                          | 2.7                   | 2.5-3.0 | 1.9            | 1.9-2.0 | 12.2                | 10.7-13.7 | 9.1            | 8.9-9.3   | \$ 18,895            | \$16,794-\$20,997 | \$ 11,993      | \$11,749-\$12,237 |
| Female                        | 2.5                   | 2.3-2.8 | 1.9            | 1.9-1.9 | 11.2                | 9.7-12.7  | 9.0            | 8.7-9.2   | \$ 17,121            | \$14,856-\$19,386 | \$ 11,009      | \$10,769-\$11,249 |
| Age                           |                       |         |                |         |                     |           |                |           |                      |                   |                |                   |
| 0-4                           | 1.5                   | 1.3-1.6 | 1.6            | 1.5-1.6 | 2.9                 | 2.3-3.4   | 2.5            | 2.4-2.6   | \$ 5,000             | \$3,743-\$6,256   | \$ 4,178       | \$4,041-\$4,315   |
| 5-14                          | 2.1                   | 1.7-2.5 | 1.9            | 1.8-1.9 | 4.6                 | 3.3-6.0   | 3.7            | 3.4-3.9   | \$ 6,700             | \$5,232-\$8,168   | \$ 5,775       | \$5,499-\$6,051   |
| 15-24                         | 1.9                   | 1.2-2.5 | 2.1            | 1.9-2.2 | 6.3                 | 4.0-8.7   | 4.9            | 4.3-5.5   | \$ 14,070            | \$8,113-\$20,028  | \$ 8,460       | \$7,524-\$9,396   |
| 25-34                         | 2.4                   | 1.5-3.3 | 1.7            | 1.6-1.8 | 11.0                | 5.8-16.2  | 4.0            | 3.6-4.4   | \$ 18,513            | \$9,779-\$27,247  | \$ 6,339       | \$5,767-\$6,910   |
| 35-44                         | 2.2                   | 1.9-2.5 | 1.7            | 1.6-1.9 | 10.1                | 7.9-12.4  | 6.1            | 4.9-7.3   | \$ 15,854            | \$12,503-\$19,206 | \$ 9,220       | \$7,878-\$10,562  |
| 45-54                         | 2.7                   | 2.4-3.1 | 1.7            | 1.7-1.8 | 12.0                | 9.9-14.1  | 7.3            | 6.6-7.9   | \$ 19,096            | \$15,989-\$22,202 | \$ 10,623      | \$9,809-\$11,438  |
| 55-64                         | 3.2                   | 2.6-3.8 | 1.9            | 1.8-2.0 | 14.9                | 12.0-17.8 | 8.9            | 8.4-9.3   | \$ 24,023            | \$19,306-\$28,740 | \$ 12,291      | \$11,696-\$12,886 |
| 65-74                         | 3.4                   | 2.8-4.1 | 2.0            | 2.0-2.1 | 18.6                | 14.1-23.0 | 10.5           | 10.1-10.9 | \$ 25,820            | \$20,512-\$31,128 | \$ 13,940      | \$13,440-\$14,441 |
| 75+                           | 2.8                   | 2.1-3.4 | 2.0            | 2.0-2.0 | 17.1                | 11.7-22.6 | 11.7           | 11.5-11.9 | \$ 19,258            | \$13,985-\$24,532 | \$ 13,420      | \$13,189-\$13,651 |
| Area Disadvantage (2011 IRSD) |                       |         |                |         |                     |           |                |           |                      |                   |                |                   |
| Q1 Least Disadvantage         | 2.4                   | 1.4-3.3 | 1.8            | 1.7-1.8 | 7.1                 | 3.3-10.8  | 7.9            | 7.5-8.3   | \$ 12,481            | \$4,338-\$20,624  | \$ 9,908       | \$9,474-\$10,341  |
| Q2                            | 2.5                   | 2.0-3.1 | 1.8            | 1.8-1.9 | 10.1                | 7.0-13.2  | 8.8            | 8.4-9.2   | \$ 15,995            | \$10,932-\$21,058 | \$ 11,176      | \$10,728-\$11,625 |
| Q3                            | 2.4                   | 1.9-3.0 | 1.9            | 1.9-2.0 | 12.3                | 7.9-16.8  | 9.5            | 9.1-9.8   | \$ 16,776            | \$11,410-\$22,142 | \$ 11,788      | \$11,389-\$12,186 |
| Q4                            | 2.5                   | 2.2-2.8 | 1.9            | 1.9-1.9 | 10.7                | 9.0-12.5  | 8.9            | 8.6-9.1   | \$ 17,228            | \$14,710-\$19,746 | \$ 11,372      | \$11,053-\$11,691 |
| Q5 Most Disadvantage          | 2.8                   | 2.5-3.0 | 2.1            | 2.0-2.1 | 12.4                | 10.8-14.0 | 9.5            | 9.2-9.8   | \$ 18,503            | \$16,208-\$20,798 | \$ 12,351      | \$12,012-\$12,689 |
| Area Remoteness (ARIA+)       |                       |         |                |         |                     |           |                |           |                      |                   |                |                   |
| Major cities                  | 2.5                   | 2.2-2.8 | 1.9            | 1.9-2.0 | 10.8                | 9.0-12.6  | 9.3            | 9.2-9.5   | \$ 16,918            | \$14,110-\$19,727 | \$ 11,892      | \$11,667-\$12,116 |
| Regional                      | 2.7                   | 2.4-3.0 | 1.9            | 1.9-1.9 | 11.7                | 10.0-13.4 | 8.5            | 8.2-8.7   | \$ 16,575            | \$14,413-\$18,737 | \$ 10,753      | \$10,481-\$11,024 |
| Remote                        | 2.7                   | 2.3-3.1 | 1.8            | 1.7-1.9 | 13.1                | 10.8-15.4 | 8.5            | 7.9-9.1   | \$ 21,377            | \$17,931-\$24,824 | \$ 11,490      | \$10,673-\$12,307 |



Table 3 Relationship of SLA attributes with standardised ratios<sup>#</sup> of LOS and cost by Aboriginality, SA public hospitals 2005-06 to 2010-11

| LOS                                             | Aboriginal             |            |        |          | non-Aboriginal         |           |        |          |
|-------------------------------------------------|------------------------|------------|--------|----------|------------------------|-----------|--------|----------|
|                                                 | Change<br>co-efficient | 95%CIs     | p      | N (SLAs) | Change<br>co-efficient | 95%CIs    | p      | N (SLAs) |
| Chronic PPH                                     |                        |            |        | 118      |                        |           |        | 119      |
| Constant                                        | 2.09                   | 0.00-5.83  | <0.001 |          | 0.46                   | 0.38-0.54 | <0.001 |          |
| Area disadvantage rank (2011 IRSD) <sup>a</sup> | 0.03                   | 0.00-0.07  | 0.005  |          | 0.01                   | 0.01-0.01 | <0.001 |          |
| Area remoteness (ARIA+) <sup>b</sup>            | 1.04                   | 0.63-1.44  | <0.001 |          | 0.02                   | 0.00-0.04 | 0.183  |          |
| Diabetes complications PPH                      |                        |            |        |          |                        |           |        |          |
| Constant                                        | 2.59                   | 0.00-10.82 | 0.003  |          | 0.41                   | 0.31-0.52 | <0.001 |          |
| Area disadvantage rank (2011 IRSD) <sup>a</sup> | 0.05                   | 0.00-0.15  | 0.005  |          | 0.01                   | 0.01-0.01 | <0.001 |          |
| Area remoteness (ARIA+) <sup>b</sup>            | 1.62                   | 0.73-2.51  | <0.001 |          | 0.02                   | 0.00-0.05 | 0.225  |          |
| Other chronic PPH                               |                        |            |        |          |                        |           |        |          |
| Constant                                        | 1.86                   | 0.00-5.45  | <0.001 |          | 0.48                   | 0.39-0.56 | <0.001 |          |
| Area disadvantage rank (2011 IRSD) <sup>a</sup> | 0.02                   | 0.00-0.06  | 0.004  |          | 0.01                   | 0.01-0.01 | <0.001 |          |
| Area remoteness (ARIA+) <sup>b</sup>            | 0.82                   | 0.43-1.21  | <0.001 |          | 0.01                   | 0.00-0.04 | 0.258  |          |
| <b>Cost</b>                                     |                        |            |        |          |                        |           |        |          |
| Chronic PPH                                     |                        |            |        |          |                        |           |        |          |
| Constant                                        | 2.44                   | 0.00-5.92  | <0.001 |          | 0.44                   | 0.36-0.51 | <0.001 |          |
| Area disadvantage rank (2011 IRSD) <sup>a</sup> | 0.02                   | 0.00-0.06  | 0.008  |          | 0.01                   | 0.01-0.01 | <0.001 |          |
| Area remoteness (ARIA+) <sup>b</sup>            | 1.18                   | 0.80-1.55  | <0.001 |          | 0.02                   | 0.00-0.04 | 0.078  |          |
| Diabetes complications PPH                      |                        |            |        |          |                        |           |        |          |
| Constant                                        | 3.95                   | 0.00-10.88 | <0.001 |          | 0.40                   | 0.30-0.50 | <0.001 |          |
| Area disadvantage rank (2011 IRSD) <sup>a</sup> | 0.03                   | 0.00-0.12  | 0.006  |          | 0.01                   | 0.01-0.01 | <0.001 |          |
| Area remoteness (ARIA+) <sup>b</sup>            | 1.43                   | 0.68-2.18  | <0.001 |          | 0.02                   | 0.00-0.05 | 0.258  |          |
| Other chronic PPH                               |                        |            |        |          |                        |           |        |          |
| Constant                                        | 1.74                   | 0.77-5.40  | <0.001 |          | 0.45                   | 0.37-0.53 | <0.001 |          |
| Area disadvantage rank (2011 IRSD) <sup>a</sup> | 0.02                   | 0.00-0.06  | 0.005  |          | 0.01                   | 0.01-0.01 | <0.001 |          |
| Area remoteness (ARIA+) <sup>b</sup>            | 1.08                   | 0.69-1.48  | <0.001 |          | 0.02                   | 0.00-0.04 | 0.090  |          |

<sup>#</sup> Square root transformed<sup>a</sup> Change is per one unit increase in SLA disadvantage rank<sup>b</sup> Change is per one unit increase in SLA ARIA+ score

**A. Age specific rates of individuals experiencing a first chronic PPH**

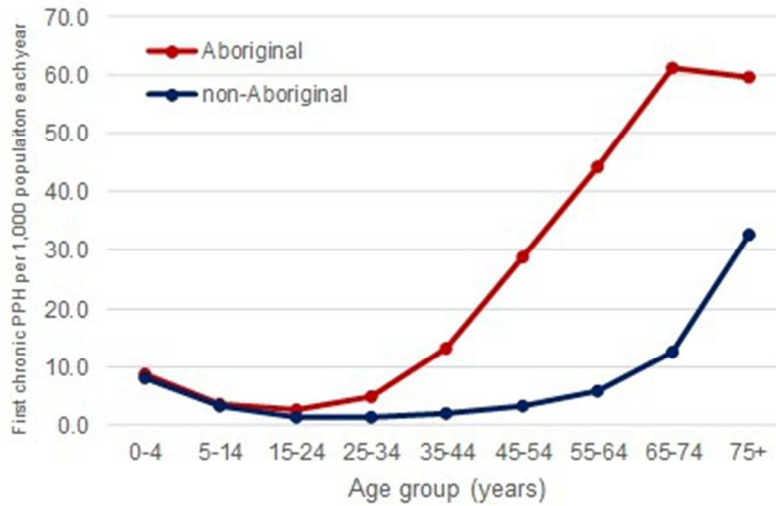

**B. Mean chronic PPH by age among individuals experiencing chronic PPH**

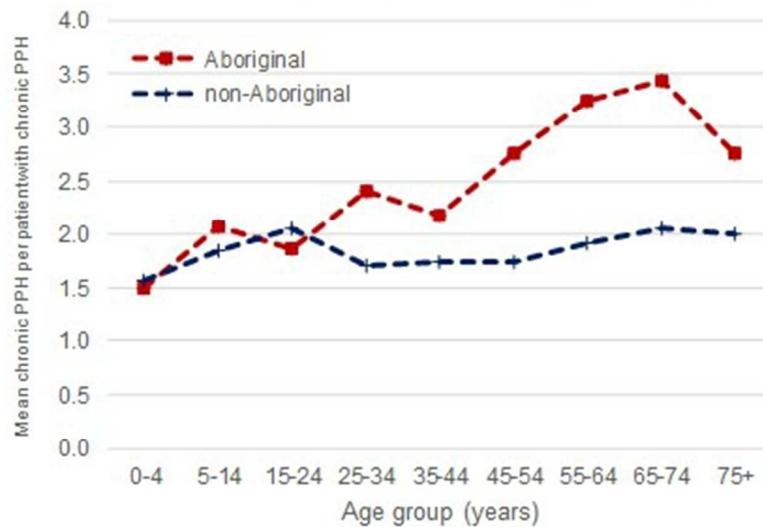

Figure 1 Rate of individuals with first chronic PPH and subsequent mean of chronic PPH by age and Aboriginality, SA public hospitals 2005-06 to 2010-11

132x165mm (98 x 98 DPI)

A. Length of stay

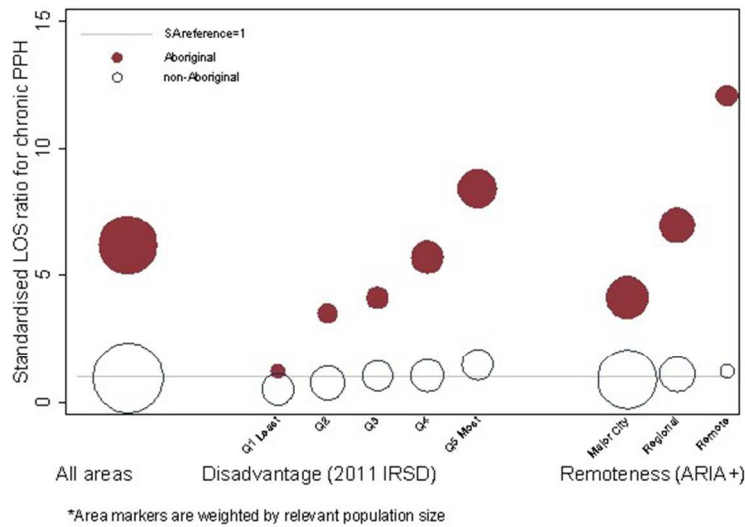

B. Costs

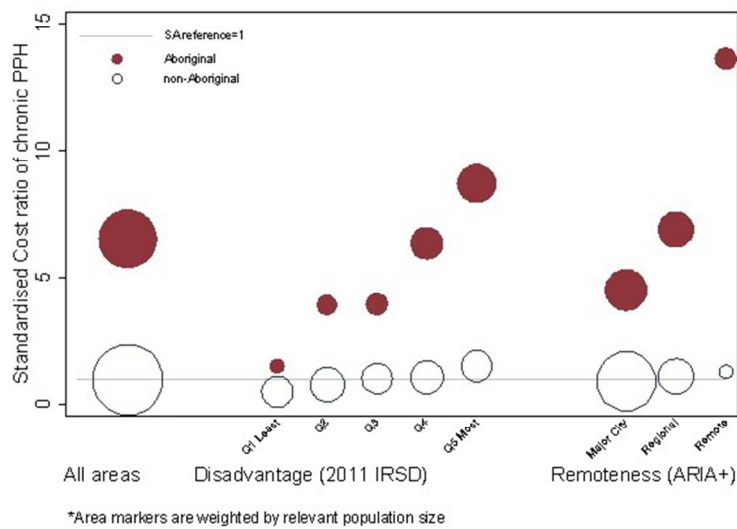

Figure 2 Ratio of sex and age adjusted public hospital LOS (Panel A) and costs (Panel B) for chronic PPH by Aboriginality, disadvantage and remoteness in SA, 2005-06 to 2010-11\*

161x243mm (96 x 96 DPI)

Supplemental Online Table A ICD-10-AM codes for chronic potentially preventable hospitalisations (PPH)\*

| Chronic condition          | ICD-10-AM codes                                                                                                                                                                                                                                                                                                                                                                                                                                                                                                                                                                                                              |
|----------------------------|------------------------------------------------------------------------------------------------------------------------------------------------------------------------------------------------------------------------------------------------------------------------------------------------------------------------------------------------------------------------------------------------------------------------------------------------------------------------------------------------------------------------------------------------------------------------------------------------------------------------------|
| Asthma                     | J45, J46 as principal diagnosis only                                                                                                                                                                                                                                                                                                                                                                                                                                                                                                                                                                                         |
| Congestive cardiac failure | I50, I11.0, J81 as principal diagnosis only, exclude cases with the following procedure codes: 33172-00, 38256-00, 38270-01, 38456-19, 38456-15, 38456-12, 38456-11, 38456-10, 38470-00, 38475-00, 38480-02, 38480-01, 38480-00, 38488-06, 38488-04, 38489-04, 38488-02, 38489-03, 38489-02, 38488-00, 38489-00, 38490-00, 38493-00, 38497-04, 38497-03, 38497-02, 38497-01, 38456-01, 38487-00, 38497-00, 38500-00, 38503-00, 38505-00, 38612-00, 38615-00, 38653-00, 38700-02, 38700-00, 38739-00, 38742-02, 38742-00, 38745-00, 38751-02, 38751-00, 38757-02, 38757-01, 38757-00, 90204-00, 90205-00, 90219-00, 90224-00. |
| Diabetes complications     | E10–E14.9 as principal diagnoses                                                                                                                                                                                                                                                                                                                                                                                                                                                                                                                                                                                             |
| COPD                       | J20, J41, J42, J43, J44, J47 as principal diagnosis only, J20 only with additional diagnoses of J41, J42, J43, J44, J47                                                                                                                                                                                                                                                                                                                                                                                                                                                                                                      |
| Angina                     | I20, I24.0, I24.8, I24.9 as principal diagnosis only, exclude cases with procedure codes not in blocks [1820] to [2016]                                                                                                                                                                                                                                                                                                                                                                                                                                                                                                      |
| Iron deficiency anaemia    | D50.1, D50.8, D50.9 as principal diagnosis only.                                                                                                                                                                                                                                                                                                                                                                                                                                                                                                                                                                             |
| Hypertension               | I10, I11.9 as principal diagnosis only, exclude cases with procedure codes according to the list of procedures excluded from the Congestive cardiac failure category above.                                                                                                                                                                                                                                                                                                                                                                                                                                                  |
| Nutritional deficiencies   | E40, E41, E42, E43, E55.0, E64.3 as principal diagnosis only.                                                                                                                                                                                                                                                                                                                                                                                                                                                                                                                                                                |
| Rheumatic heart disease    | I00 to I09 as principal diagnosis only. (Note: includes acute rheumatic fever)                                                                                                                                                                                                                                                                                                                                                                                                                                                                                                                                               |

\*Australian Institute of Health and Welfare codes used for identifying chronic potentially preventable hospitalisations within SA Health records released in 4/2015.

view only

Supplemental Online Table B Distribution of population by area disadvantage, remoteness and Aboriginal status, South Australia, 2006 to 2011 average excluding APY Lands

| Aboriginal                    |                       | Major cities     |              | Regional       |              | Remote        |              | Total            |               |
|-------------------------------|-----------------------|------------------|--------------|----------------|--------------|---------------|--------------|------------------|---------------|
|                               |                       | N                | Percent      | N              | Percent      | N             | Percent      | N                | Percent       |
| Age                           |                       |                  |              |                |              |               |              |                  |               |
|                               | 0-4                   | 1,656            | 6.1%         | 1,178          | 4.3%         | 403           | 1.5%         | 3,238            | 11.8%         |
|                               | 5-14                  | 3,344            | 12.2%        | 2,335          | 8.5%         | 799           | 2.9%         | 6,479            | 23.7%         |
|                               | 15-24                 | 3,046            | 11.1%        | 2,000          | 7.3%         | 679           | 2.5%         | 5,724            | 20.9%         |
|                               | 25-34                 | 2,033            | 7.4%         | 1,322          | 4.8%         | 474           | 1.7%         | 3,828            | 14.0%         |
|                               | 35-44                 | 1,675            | 6.1%         | 1,218          | 4.5%         | 463           | 1.7%         | 3,355            | 12.3%         |
|                               | 45-54                 | 1,241            | 4.5%         | 884            | 3.2%         | 362           | 1.3%         | 2,487            | 9.1%          |
|                               | 55-64                 | 633              | 2.3%         | 541            | 2.0%         | 164           | 0.6%         | 1,338            | 4.9%          |
|                               | 65-74                 | 279              | 1.0%         | 258            | 0.9%         | 72            | 0.3%         | 609              | 2.2%          |
|                               | 75+                   | 150              | 0.5%         | 126            | 0.5%         | 32            | 0.1%         | 307              | 1.1%          |
| Area Disadvantage (2011 IRSD) |                       |                  |              |                |              |               |              |                  |               |
|                               | Q1 Least Disadvantage | 1,051            | 3.8%         | 257            | 0.9%         | 97            | 0.4%         | 1,406            | 5.1%          |
|                               | Q2                    | 2,154            | 7.9%         | 483            | 1.8%         | 144           | 0.5%         | 2,781            | 10.2%         |
|                               | Q3                    | 2,517            | 9.2%         | 815            | 3.0%         | 140           | 0.5%         | 3,472            | 12.7%         |
|                               | Q4                    | 3,588            | 13.1%        | 2,137          | 7.8%         | 2,220         | 8.1%         | 7,945            | 29.0%         |
|                               | Q5 Most Disadvantage  | 4,746            | 17.3%        | 6,170          | 22.5%        | 846           | 3.1%         | 11,762           | 43.0%         |
| <b>Total</b>                  |                       | <b>14,056</b>    | <b>51.4%</b> | <b>9,862</b>   | <b>36.0%</b> | <b>3,448</b>  | <b>12.6%</b> | <b>27,366</b>    | <b>100.0%</b> |
| <b>non-Aboriginal</b>         |                       |                  |              |                |              |               |              |                  |               |
|                               |                       | Major cities     |              | Regional       |              | Remote        |              | Total            |               |
|                               |                       | N                | Percent      | N              | Percent      | N             | Percent      | N                | Percent       |
| Age                           |                       |                  |              |                |              |               |              |                  |               |
|                               | 0-4                   | 59,436           | 3.8%         | 22,616         | 1.5%         | 3,438         | 0.2%         | 85,490           | 5.5%          |
|                               | 5-14                  | 124,954          | 8.0%         | 52,155         | 3.3%         | 7,139         | 0.5%         | 184,249          | 11.8%         |
|                               | 15-24                 | 157,384          | 10.1%        | 46,228         | 3.0%         | 5,791         | 0.4%         | 209,403          | 13.4%         |
|                               | 25-34                 | 151,022          | 9.7%         | 42,991         | 2.8%         | 6,781         | 0.4%         | 200,794          | 12.9%         |
|                               | 35-44                 | 152,948          | 9.8%         | 53,955         | 3.5%         | 7,691         | 0.5%         | 214,594          | 13.8%         |
|                               | 45-54                 | 155,542          | 10.0%        | 58,966         | 3.8%         | 7,817         | 0.5%         | 222,326          | 14.3%         |
|                               | 55-64                 | 131,546          | 8.4%         | 53,794         | 3.5%         | 6,979         | 0.4%         | 192,319          | 12.3%         |
|                               | 65-74                 | 85,890           | 5.5%         | 35,964         | 2.3%         | 4,168         | 0.3%         | 126,022          | 8.1%          |
|                               | 75+                   | 89,966           | 5.8%         | 29,574         | 1.9%         | 3,508         | 0.2%         | 123,049          | 7.9%          |
| Area Disadvantage (2011 IRSD) |                       |                  |              |                |              |               |              |                  |               |
|                               | Q1 Least Disadvantage | 249,709          | 16.0%        | 51,252         | 3.3%         | 6,068         | 0.4%         | 307,029          | 19.7%         |
|                               | Q2                    | 300,646          | 19.3%        | 57,501         | 3.7%         | 7,839         | 0.5%         | 365,986          | 23.5%         |
|                               | Q3                    | 209,834          | 13.5%        | 64,390         | 4.1%         | 13,559        | 0.9%         | 287,783          | 18.5%         |
|                               | Q4                    | 211,354          | 13.6%        | 105,166        | 6.7%         | 21,091        | 1.4%         | 337,611          | 21.7%         |
|                               | Q5 Most Disadvantage  | 175,782          | 11.3%        | 122,500        | 7.9%         | 3,703         | 0.2%         | 301,985          | 19.4%         |
| <b>Total</b>                  |                       | <b>1,108,690</b> | <b>71.1%</b> | <b>396,244</b> | <b>25.4%</b> | <b>53,312</b> | <b>3.4%</b>  | <b>1,558,246</b> | <b>100.0%</b> |

\*Sourced from ABS 3238.0.55.001

For peer review only: <http://bmjopen.bmj.com/site/about/guidelines.xhtml>

STROBE 2007 (v4) Statement—Checklist of items that should be included in reports of *cross-sectional studies*

| Section/Topic                | Item # | Recommendation                                                                                                                                                                       | Reported on page #                                          |
|------------------------------|--------|--------------------------------------------------------------------------------------------------------------------------------------------------------------------------------------|-------------------------------------------------------------|
| Title and abstract           | 1      | (a) Indicate the study's design with a commonly used term in the title or the abstract                                                                                               | 1                                                           |
|                              |        | (b) Provide in the abstract an informative and balanced summary of what was done and what was found                                                                                  | 1&2                                                         |
| <b>Introduction</b>          |        |                                                                                                                                                                                      |                                                             |
| Background/rationale         | 2      | Explain the scientific background and rationale for the investigation being reported                                                                                                 | 2-6                                                         |
| Objectives                   | 3      | State specific objectives, including any prespecified hypotheses                                                                                                                     | 6                                                           |
| <b>Methods</b>               |        |                                                                                                                                                                                      |                                                             |
| Study design                 | 4      | Present key elements of study design early in the paper                                                                                                                              | 7                                                           |
| Setting                      | 5      | Describe the setting, locations, and relevant dates, including periods of recruitment, exposure, follow-up, and data collection                                                      | 7&8                                                         |
| Participants                 | 6      | (a) Give the eligibility criteria, and the sources and methods of selection of participants                                                                                          | 7&8                                                         |
| Variables                    | 7      | Clearly define all outcomes, exposures, predictors, potential confounders, and effect modifiers. Give diagnostic criteria, if applicable                                             | 8&9                                                         |
| Data sources/<br>measurement | 8*     | For each variable of interest, give sources of data and details of methods of assessment (measurement). Describe comparability of assessment methods if there is more than one group | 7&8                                                         |
| Bias                         | 9      | Describe any efforts to address potential sources of bias                                                                                                                            | 8                                                           |
| Study size                   | 10     | Explain how the study size was arrived at                                                                                                                                            | 7                                                           |
| Quantitative variables       | 11     | Explain how quantitative variables were handled in the analyses. If applicable, describe which groupings were chosen and why                                                         | 8&9                                                         |
| Statistical methods          | 12     | (a) Describe all statistical methods, including those used to control for confounding                                                                                                | 8&9                                                         |
|                              |        | (b) Describe any methods used to examine subgroups and interactions                                                                                                                  | 9                                                           |
|                              |        | (c) Explain how missing data were addressed                                                                                                                                          | N/A Study uses mandatory fields within administrative data. |

|                          |     |                                                                                                                                                                                                              |                                 |
|--------------------------|-----|--------------------------------------------------------------------------------------------------------------------------------------------------------------------------------------------------------------|---------------------------------|
|                          |     | (d) If applicable, describe analytical methods taking account of sampling strategy                                                                                                                           | N/A                             |
|                          |     | (e) Describe any sensitivity analyses                                                                                                                                                                        | 8&9                             |
| <b>Results</b>           |     |                                                                                                                                                                                                              |                                 |
| Participants             | 13* | (a) Report numbers of individuals at each stage of study—eg numbers potentially eligible, examined for eligibility, confirmed eligible, included in the study, completing follow-up, and analysed            | 10                              |
|                          |     | (b) Give reasons for non-participation at each stage                                                                                                                                                         | N/A                             |
|                          |     | (c) Consider use of a flow diagram                                                                                                                                                                           | Not considered appropriate      |
| Descriptive data         | 14* | (a) Give characteristics of study participants (eg demographic, clinical, social) and information on exposures and potential confounders                                                                     | 10                              |
|                          |     | (b) Indicate number of participants with missing data for each variable of interest                                                                                                                          | N/A                             |
| Outcome data             | 15* | Report numbers of outcome events or summary measures                                                                                                                                                         | 9                               |
| Main results             | 16  | (a) Give unadjusted estimates and, if applicable, confounder-adjusted estimates and their precision (eg, 95% confidence interval). Make clear which confounders were adjusted for and why they were included | 9&10                            |
|                          |     | (b) Report category boundaries when continuous variables were categorized                                                                                                                                    | Defined p8;<br>Reported pp10-13 |
|                          |     | (c) If relevant, consider translating estimates of relative risk into absolute risk for a meaningful time period                                                                                             | N/A                             |
| Other analyses           | 17  | Report other analyses done—eg analyses of subgroups and interactions, and sensitivity analyses                                                                                                               | 10-13                           |
| <b>Discussion</b>        |     |                                                                                                                                                                                                              |                                 |
| Key results              | 18  | Summarise key results with reference to study objectives                                                                                                                                                     | 13-14                           |
| Limitations              | 19  | Discuss limitations of the study, taking into account sources of potential bias or imprecision. Discuss both direction and magnitude of any potential bias                                                   | 17                              |
| Interpretation           | 20  | Give a cautious overall interpretation of results considering objectives, limitations, multiplicity of analyses, results from similar studies, and other relevant evidence                                   | 14-16                           |
| Generalisability         | 21  | Discuss the generalisability (external validity) of the study results                                                                                                                                        | 15-16                           |
| <b>Other information</b> |     |                                                                                                                                                                                                              |                                 |
| Funding                  | 22  | Give the source of funding and the role of the funders for the present study and, if applicable, for the original study on which the present article is based                                                | 19                              |

\*Give information separately for cases and controls in case-control studies and, if applicable, for exposed and unexposed groups in cohort and cross-sectional studies.

1  
2  
3  
4 **Note:** An Explanation and Elaboration article discusses each checklist item and gives methodological background and published examples of transparent reporting. The STROBE  
5 checklist is best used in conjunction with this article (freely available on the Web sites of PLoS Medicine at <http://www.plosmedicine.org/>, Annals of Internal Medicine at  
6 <http://www.annals.org/>, and Epidemiology at <http://www.epidem.com/>). Information on the STROBE Initiative is available at [www.strobe-statement.org](http://www.strobe-statement.org).  
7  
8  
9  
10  
11  
12  
13  
14  
15  
16  
17  
18  
19  
20  
21  
22  
23  
24  
25  
26  
27  
28  
29  
30  
31  
32  
33  
34  
35  
36  
37  
38  
39  
40  
41  
42  
43  
44  
45  
46  
47  
48  
49

For peer review only
