# Supplementary material for: Sociodemographic variations in the amount, duration and cost of potentially preventable hospitalisation for chronic conditions among Aboriginal and non-Aboriginal Australians: a period prevalence study of linked public hospital data
Source: PubMed Central journal article supplement — BMJ Open. 2017 Oct 15;7(10):e017331. doi: 10.1136/bmjopen-2017-017331 (PMC5652548; doi:10.1136/bmjopen-2017-017331), 2017-10-15
Supplement: bmjopen-2017-017331supp001.pdf [file bmjopen-2017-017331supp001.pdf]

**Supplemental Online Table A ICD-10-AM codes for chronic potentially preventable hospitalisations (PPH)\***

| <b>Chronic condition</b>   | <b>ICD-10-AM codes</b>                                                                                                                                                                                                                                                                                                                                                                                                                                                                                                                                                                                                       |
|----------------------------|------------------------------------------------------------------------------------------------------------------------------------------------------------------------------------------------------------------------------------------------------------------------------------------------------------------------------------------------------------------------------------------------------------------------------------------------------------------------------------------------------------------------------------------------------------------------------------------------------------------------------|
| Asthma                     | J45, J46 as principal diagnosis only                                                                                                                                                                                                                                                                                                                                                                                                                                                                                                                                                                                         |
| Congestive cardiac failure | I50, I11.0, J81 as principal diagnosis only, exclude cases with the following procedure codes: 33172-00, 38256-00, 38270-01, 38456-19, 38456-15, 38456-12, 38456-11, 38456-10, 38470-00, 38475-00, 38480-02, 38480-01, 38480-00, 38488-06, 38488-04, 38489-04, 38488-02, 38489-03, 38489-02, 38488-00, 38489-00, 38490-00, 38493-00, 38497-04, 38497-03, 38497-02, 38497-01, 38456-01, 38487-00, 38497-00, 38500-00, 38503-00, 38505-00, 38612-00, 38615-00, 38653-00, 38700-02, 38700-00, 38739-00, 38742-02, 38742-00, 38745-00, 38751-02, 38751-00, 38757-02, 38757-01, 38757-00, 90204-00, 90205-00, 90219-00, 90224-00. |
| Diabetes complications     | E10–E14.9 as principal diagnoses                                                                                                                                                                                                                                                                                                                                                                                                                                                                                                                                                                                             |
| COPD                       | J20, J41, J42, J43, J44, J47 as principal diagnosis only, J20 only with additional diagnoses of J41, J42, J43, J44, J47                                                                                                                                                                                                                                                                                                                                                                                                                                                                                                      |
| Angina                     | I20, I24.0, I24.8, I24.9 as principal diagnosis only, exclude cases with procedure codes not in blocks [1820] to [2016]                                                                                                                                                                                                                                                                                                                                                                                                                                                                                                      |
| Iron deficiency anaemia    | D50.1, D50.8, D50.9 as principal diagnosis only.                                                                                                                                                                                                                                                                                                                                                                                                                                                                                                                                                                             |
| Hypertension               | I10, I11.9 as principal diagnosis only, exclude cases with procedure codes according to the list of procedures excluded from the Congestive cardiac failure category above.                                                                                                                                                                                                                                                                                                                                                                                                                                                  |
| Nutritional deficiencies   | E40, E41, E42, E43, E55.0, E64.3 as principal diagnosis only.                                                                                                                                                                                                                                                                                                                                                                                                                                                                                                                                                                |
| Rheumatic heart disease    | I00 to I09 as principal diagnosis only. (Note: includes acute rheumatic fever)                                                                                                                                                                                                                                                                                                                                                                                                                                                                                                                                               |

\*Australian Institute of Health and Welfare codes used for identifying chronic potentially preventable hospitalisations within SA Health records released in 4/2015.

**Supplemental Online Table B Distribution of population by area disadvantage, remoteness and Aboriginal status, South Australia, 2006 to 2011 average excluding APY Lands**

**Aboriginal**

|                               |                       | Major cities  |              | Regional     |              | Remote       |              | Total         |               |
|-------------------------------|-----------------------|---------------|--------------|--------------|--------------|--------------|--------------|---------------|---------------|
|                               |                       | N             | Percent      | N            | Percent      | N            | Percent      | N             | Percent       |
| Age                           |                       |               |              |              |              |              |              |               |               |
|                               | 0-4                   | 1,656         | 6.1%         | 1,178        | 4.3%         | 403          | 1.5%         | 3,238         | 11.8%         |
|                               | 5-14                  | 3,344         | 12.2%        | 2,335        | 8.5%         | 799          | 2.9%         | 6,479         | 23.7%         |
|                               | 15-24                 | 3,046         | 11.1%        | 2,000        | 7.3%         | 679          | 2.5%         | 5,724         | 20.9%         |
|                               | 25-34                 | 2,033         | 7.4%         | 1,322        | 4.8%         | 474          | 1.7%         | 3,828         | 14.0%         |
|                               | 35-44                 | 1,675         | 6.1%         | 1,218        | 4.5%         | 463          | 1.7%         | 3,355         | 12.3%         |
|                               | 45-54                 | 1,241         | 4.5%         | 884          | 3.2%         | 362          | 1.3%         | 2,487         | 9.1%          |
|                               | 55-64                 | 633           | 2.3%         | 541          | 2.0%         | 164          | 0.6%         | 1,338         | 4.9%          |
|                               | 65-74                 | 279           | 1.0%         | 258          | 0.9%         | 72           | 0.3%         | 609           | 2.2%          |
|                               | 75+                   | 150           | 0.5%         | 126          | 0.5%         | 32           | 0.1%         | 307           | 1.1%          |
| Area Disadvantage (2011 IRSD) |                       |               |              |              |              |              |              |               |               |
|                               | Q1 Least Disadvantage | 1,051         | 3.8%         | 257          | 0.9%         | 97           | 0.4%         | 1,406         | 5.1%          |
|                               | Q2                    | 2,154         | 7.9%         | 483          | 1.8%         | 144          | 0.5%         | 2,781         | 10.2%         |
|                               | Q3                    | 2,517         | 9.2%         | 815          | 3.0%         | 140          | 0.5%         | 3,472         | 12.7%         |
|                               | Q4                    | 3,588         | 13.1%        | 2,137        | 7.8%         | 2,220        | 8.1%         | 7,945         | 29.0%         |
|                               | Q5 Most Disadvantage  | 4,746         | 17.3%        | 6,170        | 22.5%        | 846          | 3.1%         | 11,762        | 43.0%         |
| <b>Total</b>                  |                       | <b>14,056</b> | <b>51.4%</b> | <b>9,862</b> | <b>36.0%</b> | <b>3,448</b> | <b>12.6%</b> | <b>27,366</b> | <b>100.0%</b> |

**non-Aboriginal**

|                               |                       | Major cities     |              | Regional       |              | Remote        |             | Total            |               |
|-------------------------------|-----------------------|------------------|--------------|----------------|--------------|---------------|-------------|------------------|---------------|
|                               |                       | N                | Percent      | N              | Percent      | N             | Percent     | N                | Percent       |
| Age                           |                       |                  |              |                |              |               |             |                  |               |
|                               | 0-4                   | 59,436           | 3.8%         | 22,616         | 1.5%         | 3,438         | 0.2%        | 85,490           | 5.5%          |
|                               | 5-14                  | 124,954          | 8.0%         | 52,155         | 3.3%         | 7,139         | 0.5%        | 184,249          | 11.8%         |
|                               | 15-24                 | 157,384          | 10.1%        | 46,228         | 3.0%         | 5,791         | 0.4%        | 209,403          | 13.4%         |
|                               | 25-34                 | 151,022          | 9.7%         | 42,991         | 2.8%         | 6,781         | 0.4%        | 200,794          | 12.9%         |
|                               | 35-44                 | 152,948          | 9.8%         | 53,955         | 3.5%         | 7,691         | 0.5%        | 214,594          | 13.8%         |
|                               | 45-54                 | 155,542          | 10.0%        | 58,966         | 3.8%         | 7,817         | 0.5%        | 222,326          | 14.3%         |
|                               | 55-64                 | 131,546          | 8.4%         | 53,794         | 3.5%         | 6,979         | 0.4%        | 192,319          | 12.3%         |
|                               | 65-74                 | 85,890           | 5.5%         | 35,964         | 2.3%         | 4,168         | 0.3%        | 126,022          | 8.1%          |
|                               | 75+                   | 89,966           | 5.8%         | 29,574         | 1.9%         | 3,508         | 0.2%        | 123,049          | 7.9%          |
| Area Disadvantage (2011 IRSD) |                       |                  |              |                |              |               |             |                  |               |
|                               | Q1 Least Disadvantage | 249,709          | 16.0%        | 51,252         | 3.3%         | 6,068         | 0.4%        | 307,029          | 19.7%         |
|                               | Q2                    | 300,646          | 19.3%        | 57,501         | 3.7%         | 7,839         | 0.5%        | 365,986          | 23.5%         |
|                               | Q3                    | 209,834          | 13.5%        | 64,390         | 4.1%         | 13,559        | 0.9%        | 287,783          | 18.5%         |
|                               | Q4                    | 211,354          | 13.6%        | 105,166        | 6.7%         | 21,091        | 1.4%        | 337,611          | 21.7%         |
|                               | Q5 Most Disadvantage  | 175,782          | 11.3%        | 122,500        | 7.9%         | 3,703         | 0.2%        | 301,985          | 19.4%         |
| <b>Total</b>                  |                       | <b>1,108,690</b> | <b>71.1%</b> | <b>396,244</b> | <b>25.4%</b> | <b>53,312</b> | <b>3.4%</b> | <b>1,558,246</b> | <b>100.0%</b> |

\*Sourced from ABS 3238.0.55.001
